# Supplementary material for: Patients with chronic periodontitis present increased risk for primary Sjögren syndrome: a nationwide population-based cohort study
Source: PeerJ. 2018 Jun 20;6:e5109. doi: 10.7717/peerj.5109 (PMC6015484; doi:10.7717/peerj.5109)
Supplement: Supplemental Information 1 — The dataset was to describe the demographic data and estimate the hazard ratios of primary Sjögren syndrome. [file peerj-06-5109-s001.xlsx]

## Sheet: Sheet1
No	Periodontitis	age	age_g	gender	income	Urbanization	Hypertension	Hyperlipidemia	Insomnia	CCI	sjogren_event	track_yrs
1	1	55.1667	3	1	3	1	0	0	0	0	0	5.13621
2	0	39.4167	2	1	1	2	0	0	0	0	0	5.70294
3	0	36.3333	2	0	1	2	0	0	0	0	0	2.44764
4	1	49.8333	3	0	2	2	0	0	0	0	0	5.44285
5	1	81	4	1	1	2	1	1	0	1	0	4.33402
6	1	15.3333	1	0	1	3	0	0	0	0	0	6.33265
7	1	68.4167	4	0	1	1	1	0	1	1	0	6.64203
8	1	79.1667	4	1	2	2	0	0	0	1	0	4.14237
9	1	25.6667	2	1	2	1	0	0	1	0	0	6.16838
10	1	50.0833	3	1	1	1	1	1	0	1	0	4.74743
11	1	25.75	2	1	2	1	0	0	0	0	0	4.65161
12	1	35.25	2	1	1	1	0	0	0	0	0	5.39904
13	0	61.4167	3	0	2	2	1	0	1	0	0	6.39836
14	1	46.5833	3	1	3	1	0	0	0	0	0	6.36277
15	1	25.5833	2	0	1	1	0	0	0	0	0	5.3963
16	1	54.3333	3	0	1	1	0	0	0	0	0	4.87885
17	1	52.0833	3	1	1	1	0	0	0	0	0	5.9384
18	1	22.3333	2	1	1	2	0	0	0	0	0	4.29569
19	0	40.1667	3	0	3	1	0	0	0	0	0	1.47844
20	1	70.6667	4	0	1	1	0	1	0	1	0	4.15606
21	0	38.3333	2	1	3	2	1	0	0	0	0	3.06913
22	1	57.5833	3	0	1	1	0	0	1	0	0	6.23135
23	1	20.0833	2	1	1	2	0	0	0	0	0	2.94593
24	0	76.9167	4	1	1	1	1	0	0	1	0	5.71389
25	0	60.3333	3	1	1	1	0	0	0	0	0	5.80698
26	1	55.25	3	1	3	1	0	0	1	1	0	3.90144
27	1	51.0833	3	0	3	1	0	0	1	2	0	3.79466
28	0	39.8333	2	1	1	1	0	0	0	0	0	5.3744
29	0	44.75	3	1	2	1	0	0	0	0	0	5.95483
30	0	57.6667	3	1	3	1	1	1	0	0	0	3.28542
31	1	48.25	3	0	1	1	0	0	1	0	0	4.11773
32	1	56.6667	3	0	3	1	0	0	0	0	0	5.48392
33	0	47.9167	3	1	2	2	0	0	0	0	0	5.84531
34	0	16.25	1	0	1	1	0	0	0	0	0	5.41821
35	1	20	2	0	1	1	0	0	0	0	0	6.41478
36	1	24.5833	2	0	2	1	0	0	0	0	0	6.66119
37	0	54.6667	3	1	3	1	1	1	0	0	0	4.56126
38	0	35.1667	2	1	2	1	0	0	0	0	0	5.10609
39	1	19.0833	1	0	1	1	0	0	0	0	0	6.94593
40	1	45.75	3	1	2	2	1	1	0	0	0	4.58316
41	0	49.4167	3	0	1	1	0	0	1	0	0	5.16906
42	0	28.9167	2	1	1	2	0	0	0	0	0	4.41068
43	1	52.0833	3	1	3	1	0	1	0	1	0	4.18891
44	0	55.8333	3	1	2	1	0	1	0	1	0	6.05065
45	0	16	1	0	1	2	0	0	0	0	0	6.5681
46	1	50.4167	3	1	3	2	0	0	0	2	0	4.27105
47	1	26	2	0	2	2	0	0	0	0	0	3.7974
48	1	53.75	3	1	1	3	0	0	1	0	0	4.54483
49	0	47.1667	3	1	3	1	0	0	0	1	0	2.97331
50	1	19.5	1	0	1	3	0	0	0	0	0	4.88706
51	0	56.4167	3	0	3	1	0	0	0	1	0	2.97331
52	1	50.75	3	0	2	1	1	1	0	0	0	6.31896
53	1	67.4167	4	1	1	2	0	0	0	1	0	3.10746
54	0	28.3333	2	1	2	1	0	0	0	0	0	3.34018
55	1	61.8333	3	1	3	2	0	0	0	0	0	6.40383
56	1	52.9167	3	1	3	2	0	0	0	1	0	6.78713
57	1	25.5	2	0	2	1	0	0	1	0	0	3.71526
58	0	45.5	3	1	1	1	1	1	0	2	0	4.18891
59	1	35.9167	2	0	3	1	0	0	0	0	0	6.5681
60	0	20.25	2	0	1	2	0	0	0	0	0	6.35181
61	0	46.5	3	0	3	2	0	0	1	0	0	4.76934
62	0	69.75	4	0	1	2	1	0	1	2	0	6.60643
63	0	32.4167	2	0	1	1	0	0	0	0	0	6.16564
64	1	19.9167	1	1	1	2	0	0	0	0	0	3.32649
65	0	71.75	4	1	2	2	1	0	0	1	0	4.26283
66	1	54.4167	3	0	3	1	0	0	1	0	0	5.72211
67	0	43.8333	3	0	1	1	0	0	0	0	0	3.56194
68	0	14.9167	1	0	1	2	0	0	0	0	0	6.98973
69	1	47.5833	3	1	2	2	0	1	0	1	0	6.77618
70	0	54.25	3	0	3	1	0	0	1	0	1	5.08419
71	0	9.5	1	0	1	1	0	0	0	1	0	6.09719
72	1	51.9167	3	0	1	1	0	0	1	0	0	4.17796
73	1	50.5833	3	1	3	1	0	0	1	1	0	2.25599
74	0	52	3	1	3	2	0	0	0	0	0	6.35455
75	1	79.25	4	0	1	1	1	1	0	1	0	4.84873
76	1	45.5	3	1	3	1	0	0	0	0	0	2.6475
77	0	18	1	0	1	1	0	0	0	0	0	6.96783
78	0	19.6667	1	1	1	1	0	0	1	0	0	2.78166
79	0	17.25	1	0	1	1	0	0	0	0	0	6.19849
80	0	57.5833	3	1	3	1	1	0	0	1	0	3.06092
81	1	71.3333	4	1	1	1	1	0	1	0	0	6.0178
82	1	88.9167	4	0	1	2	1	0	0	0	0	5.01848
83	1	14.9167	1	1	1	1	0	0	0	0	0	6.73511
84	1	37.9167	2	1	3	1	0	0	1	1	0	3.54825
85	0	31	2	1	2	3	0	0	0	0	0	6.89665
86	1	66.75	4	1	1	1	0	0	0	0	0	3.70157
87	0	38.75	2	1	1	2	0	0	0	0	0	4.09035
88	1	27.5833	2	1	2	1	0	0	0	0	0	3.91786
89	1	42.1667	3	1	2	1	0	0	0	0	0	4.27105
90	1	62.1667	3	0	1	3	0	0	0	0	0	3.96988
91	1	33.25	2	1	2	1	0	0	0	1	0	1.62902
92	0	18.4167	1	0	1	1	0	0	0	0	0	4.35318
93	0	47.9167	3	0	1	2	0	0	1	0	0	3.56742
94	1	40.1667	3	0	1	2	0	0	0	0	0	4.22724
95	1	14.1667	1	0	1	1	0	0	0	0	0	4.47365
96	0	64.5833	3	1	1	1	1	0	0	0	0	5.24025
97	0	24.0833	2	1	1	1	0	0	0	0	0	5.7796
98	1	47.0833	3	0	3	1	0	0	0	0	0	3.90418
99	1	32.1667	2	0	1	2	0	0	0	0	0	2.89117
100	0	26.0833	2	0	2	1	0	0	0	0	0	4.46543
101	1	14.25	1	1	1	2	0	0	0	0	0	6.88296
102	1	47.0833	3	1	1	2	1	1	0	1	0	6.76249
103	0	27.5	2	1	2	1	0	0	0	0	0	4.3614
104	0	75.3333	4	0	1	1	1	0	1	1	1	0.399726
105	0	57.0833	3	0	1	1	0	0	1	0	0	6.57084
106	1	47.25	3	0	2	1	0	0	0	0	0	4.20534
107	0	46.8333	3	1	2	1	0	0	1	1	0	6.2642
108	1	49.8333	3	0	3	1	0	0	0	0	1	1.08693
109	0	44.9167	3	1	2	3	0	0	0	0	0	3.59754
110	0	63.1667	3	1	3	1	0	0	0	0	0	5.14168
111	1	35.25	2	1	1	1	0	0	0	0	0	6.01232
112	1	48.75	3	0	2	1	0	0	0	0	0	5.12799
113	0	51.9167	3	0	3	1	0	0	1	1	1	2.61465
114	1	23.25	2	0	1	1	0	0	0	0	0	6.85284
115	1	63.1667	3	1	2	1	0	0	0	0	0	1.64545
116	0	60.5833	3	1	2	1	1	0	0	0	0	5.68378
117	0	53.3333	3	1	1	3	0	0	1	1	0	2.77344
118	0	46.4167	3	1	3	2	0	0	0	0	0	6.41205
119	1	19.5833	1	0	1	1	0	0	0	0	0	4.40246
120	1	13.25	1	0	1	1	0	0	0	0	0	5.18823
121	1	43.25	3	0	1	1	0	0	0	1	0	4.49829
122	0	54.3333	3	1	2	1	0	0	1	0	0	6.02875
123	1	49.6667	3	0	2	3	0	0	1	0	0	2.17933
124	0	33.6667	2	0	2	1	0	0	0	0	0	3.79466
125	0	75.0833	4	1	1	1	1	1	0	2	0	3.42505
126	1	66.6667	4	0	1	1	0	0	1	0	0	3.68789
127	0	19.4167	1	0	1	1	0	0	0	0	0	4.90075
128	0	29.25	2	0	2	2	0	0	0	0	0	2.79535
129	1	43.4167	3	0	3	1	0	0	0	0	0	6.69678
130	0	27.1667	2	0	1	1	0	0	0	0	0	5.49487
131	1	19.5	1	0	1	1	0	0	0	0	0	5.48118
132	1	23.75	2	0	1	2	0	0	0	0	0	6.20671
133	1	39.3333	2	1	1	1	0	0	0	0	0	0.205339
134	0	53.1667	3	1	3	1	0	0	1	0	0	2.5681
135	0	44.4167	3	0	2	1	0	0	0	0	0	5.577
136	0	39.75	2	1	1	1	0	0	1	0	0	5.50308
137	0	59.1667	3	1	3	1	1	0	1	1	0	5.80698
138	1	57.9167	3	0	1	2	0	0	0	0	1	2.55989
139	0	16.3333	1	1	1	2	0	0	0	0	0	3.85763
140	1	48.4167	3	1	3	1	0	0	0	0	0	1.72758
141	0	33.75	2	0	1	2	0	0	0	0	0	6.50513
142	1	56.75	3	1	3	1	1	0	0	1	0	5.62355
143	1	54.8333	3	0	3	1	1	0	1	1	0	5.57426
144	0	58.1667	3	1	3	1	0	0	0	0	0	4.91444
145	1	61.0833	3	1	3	1	0	0	0	0	0	5.17454
146	1	45.3333	3	0	1	1	0	0	0	0	0	6.01506
147	1	35.9167	2	1	2	2	1	1	0	0	0	4.04381
148	1	27.3333	2	0	1	1	0	0	0	0	0	4.70363
149	0	15.75	1	1	1	1	0	0	0	0	0	6.37919
150	0	63.75	3	0	1	1	0	0	1	1	0	6.24504
151	0	51.75	3	0	3	1	1	1	0	0	0	4.27105
152	0	58.6667	3	1	2	2	0	0	0	0	0	6.93224
153	0	30.5833	2	0	2	2	0	0	0	1	0	2.52156
154	0	35.9167	2	0	3	1	0	1	0	1	1	5.62355
155	0	52.3333	3	0	1	1	0	0	1	0	0	1.92471
156	0	25.8333	2	1	1	2	0	0	0	0	0	6.34634
157	0	50.9167	3	0	1	2	0	0	0	0	0	5.61533
158	1	83.9167	4	1	1	1	1	0	1	0	0	3.69336
159	0	27	2	0	1	1	0	0	0	0	0	2.29706
160	1	32	2	1	3	1	0	0	0	0	0	4.1588
161	0	69.5833	4	0	2	2	1	1	1	2	0	6.3436
162	1	23.0833	2	1	1	1	0	0	0	0	0	4.7091
163	1	44.25	3	0	2	3	0	1	0	0	0	4.54209
164	0	62	3	1	1	1	0	1	0	1	0	5.3306
165	1	50.9167	3	0	3	1	0	0	1	1	0	4.95277
166	1	46.1667	3	1	2	1	0	0	0	0	0	3.95346
167	0	52.6667	3	0	2	1	0	0	0	0	0	2.97057
168	1	67.6667	4	0	2	2	1	0	0	0	0	5.5332
169	0	18	1	1	1	1	0	0	0	0	0	6.60096
170	0	42.75	3	0	2	1	0	0	0	0	0	5.55784
171	1	60.0833	3	0	1	2	0	0	1	1	0	6.76249
172	0	53.9167	3	1	1	1	0	0	0	0	0	4.08487
173	1	23.9167	2	0	1	1	0	0	0	1	0	6.09172
174	1	24.1667	2	1	1	2	0	0	0	0	0	6.41752
175	0	27.25	2	1	2	1	0	0	0	1	0	6.28337
176	1	40.1667	3	0	1	3	0	0	1	0	0	3.75086
177	0	40.0833	3	1	1	3	0	0	0	1	0	5.05681
178	0	51.75	3	0	2	1	0	1	0	1	0	4.11225
179	1	37.75	2	1	2	1	0	0	0	0	0	3.77276
180	0	70.5	4	0	2	2	1	0	0	0	0	3.40862
181	1	13	1	1	1	1	0	0	0	0	0	3.92608
182	1	25.5833	2	0	1	1	0	0	1	1	0	5.44011
183	0	54.6667	3	1	1	1	0	0	0	1	0	4.27652
184	0	64.1667	3	1	3	1	0	0	0	0	0	4.33128
185	0	48.75	3	1	3	2	1	0	0	0	0	6.23956
186	1	44	3	1	2	1	0	0	0	0	0	6.57358
187	0	26.8333	2	1	2	1	0	0	0	0	0	5.24298
188	1	45.9167	3	0	1	1	0	0	1	0	0	5.57426
189	1	54.9167	3	1	1	1	0	0	0	0	0	5.28405
190	1	51.5	3	0	1	1	0	0	0	1	0	6.31896
191	0	45.8333	3	0	3	1	0	1	1	1	0	6.20945
192	1	54.5833	3	0	1	1	0	0	0	0	0	4.37235
193	1	52	3	0	2	1	0	0	0	0	0	6.62286
194	1	17.25	1	1	1	1	0	0	0	0	0	2.705
195	0	50.9167	3	0	1	1	0	0	1	0	0	3.61123
196	1	36.0833	2	1	3	1	0	0	0	0	0	2.01232
197	0	51.3333	3	1	1	1	0	0	0	0	0	5.97399
198	1	57.3333	3	1	1	1	0	0	1	0	0	6.55715
199	1	22.8333	2	0	1	2	0	0	0	0	0	4.75291
200	0	28.3333	2	1	1	1	0	0	0	0	0	3.49897
201	1	68.9167	4	0	1	1	0	0	1	2	0	1.02669
202	0	86.25	4	0	1	1	1	1	0	1	0	5.31143
203	1	62.4167	3	0	3	1	0	0	0	0	0	3.5948
204	0	47.5833	3	0	3	1	0	0	1	0	1	1.50308
205	1	65.9167	4	1	1	2	0	0	0	0	0	4.1013
206	0	60.9167	3	0	1	2	1	0	1	2	0	2.78166
207	0	23.4167	2	0	1	2	0	0	0	0	0	5.02943
208	0	42.6667	3	1	3	1	0	0	0	0	0	1.34155
209	0	29	2	1	3	2	0	0	0	0	0	4.36961
210	1	24.6667	2	0	2	3	0	0	0	0	0	3.59754
211	1	36.6667	2	0	1	3	0	0	0	0	0	5.9384
212	1	55.5833	3	0	1	1	0	0	0	0	0	5.16906
213	1	14.25	1	0	1	2	0	0	0	0	0	4.69268
214	1	32.5833	2	0	2	3	0	0	0	0	0	6.61465
215	0	23.9167	2	1	1	1	0	0	0	0	0	5.22656
216	0	57.9167	3	1	1	1	1	0	0	1	0	3.90691
217	1	36.6667	2	1	3	1	0	0	0	0	0	5.56605
218	1	68.9167	4	0	1	1	0	1	1	1	0	4.54483
219	0	35.9167	2	0	2	1	0	0	0	0	0	4.54209
220	1	49.4167	3	0	1	2	0	0	1	0	0	6.49966
221	0	42.0833	3	1	2	2	0	0	1	2	0	6.36003
222	1	42.6667	3	1	1	1	0	0	0	0	0	6.75428
223	1	83.1667	4	1	1	3	1	0	0	2	0	1.83162
224	1	30.5833	2	0	3	1	0	0	0	0	0	5.31964
225	1	53.4167	3	1	2	1	0	0	0	0	0	4.3833
226	1	29.4167	2	0	2	1	0	0	1	0	0	5.70294
227	1	62.6667	3	1	2	1	0	0	1	2	0	5.06502
228	1	61.5	3	1	2	2	1	0	0	0	0	6.4011
229	1	39.0833	2	1	3	3	0	0	0	1	0	6.60643
230	1	19	1	1	1	2	0	0	0	1	0	5.30595
231	1	17.9167	1	0	1	1	0	0	0	0	0	6.34634
232	0	24.4167	2	1	1	1	0	0	0	0	0	5.93292
233	1	48.3333	3	0	3	2	0	0	0	0	0	3.92882
234	1	54.5	3	1	3	1	1	0	0	0	0	4.3833
235	1	31	2	1	2	1	0	0	0	0	0	5.90554
236	1	35	2	0	3	3	0	0	0	0	0	3.93703
237	1	59.9167	3	1	2	1	0	0	0	0	0	5.03217
238	1	42.8333	3	1	1	1	0	0	0	0	0	6.16564
239	0	58.1667	3	0	2	2	1	0	1	1	0	6.88296
240	0	47.8333	3	1	3	1	1	0	0	1	0	2.37919
241	1	43.5833	3	1	3	1	1	0	0	1	0	4.75565
242	0	18.4167	1	0	1	2	0	0	0	0	0	5.62628
243	1	36.5	2	0	3	3	0	0	0	0	0	3.46612
244	0	14.3333	1	1	1	2	0	0	0	0	0	2.97878
245	0	43	3	0	2	1	0	0	0	1	0	2.78166
246	0	31.1667	2	0	3	1	0	0	0	0	0	5.94387
247	0	47.1667	3	1	3	1	0	0	1	0	0	2.76797
248	0	29	2	0	2	2	0	0	0	1	0	3.15948
249	1	46.25	3	1	2	2	0	1	1	1	0	3.52088
250	0	59.3333	3	0	1	1	1	1	0	1	0	1.70842
251	1	18.9167	1	1	1	1	0	0	0	0	0	2.91307
252	0	58.1667	3	1	2	1	1	0	1	1	0	2.81999
253	1	80.0833	4	1	1	1	0	0	1	0	0	6.21766
254	1	58.6667	3	0	3	1	0	0	0	1	0	5.10062
255	0	23.25	2	0	1	2	0	0	0	0	0	3.71253
256	1	72.3333	4	1	1	2	1	0	0	1	0	4.83231
257	0	28.1667	2	0	1	1	0	0	0	0	0	4.70363
258	0	18.0833	1	1	1	2	0	0	0	0	0	6.97878
259	1	52.5	3	0	2	1	0	0	0	0	0	5.57426
260	1	20.0833	2	0	1	2	0	0	0	0	0	6.10541
261	0	51.6667	3	0	3	2	0	0	0	0	0	3.11841
262	0	46.6667	3	1	2	1	0	0	0	0	0	4.43532
263	1	51.75	3	0	3	1	0	0	0	1	0	3.94798
264	0	36.75	2	1	2	2	0	0	0	0	0	6.83641
265	0	16.6667	1	1	1	2	0	0	1	0	0	6.85284
266	0	57	3	0	1	1	1	1	0	1	0	5.22929
267	1	71.1667	4	1	1	1	0	1	1	2	0	6.01506
268	0	49.8333	3	0	2	1	0	0	1	0	0	6.49144
269	1	41.75	3	1	2	2	0	0	0	0	0	4.64613
270	1	18.5	1	0	1	2	0	0	0	0	0	6.94867
271	0	52.4167	3	0	1	2	0	0	1	0	0	2.66667
272	1	58.8333	3	0	1	1	0	0	1	0	0	5.02122
273	1	17.5	1	1	1	1	0	0	0	0	0	6.89938
274	1	17.4167	1	1	1	3	0	0	0	0	0	2.75702
275	1	25.8333	2	1	1	1	0	0	0	0	0	6.80356
276	0	29.5833	2	1	1	1	0	0	1	0	0	5.63176
277	1	14.4167	1	1	1	1	0	0	0	0	1	1.16632
278	1	58.6667	3	1	3	1	0	0	0	1	0	6.43943
279	1	57.1667	3	0	3	1	0	1	0	1	0	5.67556
280	0	28.0833	2	1	2	2	0	1	1	1	0	5.71389
281	0	14.75	1	0	1	1	0	0	0	0	0	5.77139
282	0	40.8333	3	0	3	1	0	0	0	0	0	2.66667
283	1	16	1	0	1	1	0	0	0	0	0	4.6653
284	0	34.4167	2	0	1	1	0	0	0	0	0	2.68309
285	0	61.9167	3	1	3	1	1	1	0	1	0	4.00821
286	0	64.9167	3	1	2	2	0	0	1	2	0	6.0178
287	1	26.5833	2	0	1	1	0	0	0	0	0	4.9473
288	0	44.75	3	0	2	3	0	0	0	0	0	2.09993
289	0	38.8333	2	1	1	1	0	0	0	0	0	5.24298
290	0	67	4	0	1	1	1	0	0	1	0	3.19233
291	1	16.6667	1	1	1	1	0	0	0	0	0	6.21766
292	1	83.5833	4	0	1	1	1	0	0	1	0	4.44901
293	1	39.8333	2	0	3	1	0	0	1	0	0	4.27105
294	0	66.4167	4	1	3	1	1	1	0	1	0	5.62902
295	1	47.1667	3	0	1	2	0	0	0	0	0	6.74606
296	1	30.5833	2	1	2	1	0	0	0	0	0	5.57974
297	0	21.6667	2	0	1	1	0	0	1	0	0	4.97194
298	0	71.5	4	0	1	1	1	1	0	1	0	5.15264
299	0	20.75	2	0	1	1	0	0	0	0	0	3.6386
300	1	42.3333	3	0	1	2	0	0	0	0	0	6.61191
301	0	21.5833	2	1	1	1	0	0	0	0	0	1.85079
302	1	18.1667	1	1	1	1	0	0	0	0	0	6.23956
303	1	49.5	3	1	2	1	1	0	0	0	0	6.30253
304	0	50.0833	3	0	1	2	0	0	0	0	0	4.67899
305	0	23.3333	2	1	2	1	0	0	0	0	0	4.82683
306	0	68.6667	4	0	1	1	0	0	1	1	0	5.06776
307	0	53.8333	3	1	1	1	1	1	0	1	0	5.96304
308	1	42.5833	3	1	3	1	0	0	0	1	0	6.55715
309	1	40.0833	3	0	1	1	0	0	0	0	0	4.93908
310	0	42.5833	3	0	3	1	0	0	0	0	0	6.26146
311	0	26	2	1	1	3	0	0	1	0	0	4.13963
312	1	51.9167	3	1	2	1	0	0	0	0	0	6.89938
313	0	39.25	2	1	1	2	0	0	0	0	0	5.34155
314	0	53.0833	3	0	2	2	0	1	1	0	0	2.75154
315	0	20	2	0	1	1	0	0	0	0	0	4.3833
316	0	51.0833	3	1	1	1	1	0	0	0	0	6.82272
317	0	26.5833	2	1	3	1	0	0	0	0	0	6.10815
318	1	20.1667	2	0	1	1	0	0	0	0	0	4.00274
319	0	40.3333	3	1	3	1	1	1	1	1	0	6.6694
320	1	30.3333	2	0	1	2	0	0	0	0	0	5.33881
321	1	60.8333	3	1	2	3	0	0	0	1	0	6.75702
322	0	67.1667	4	0	1	2	0	0	0	1	0	5.01848
323	0	65	4	1	2	2	0	0	0	0	0	6.2204
324	1	19.6667	1	1	1	1	0	0	0	0	0	6.16564
325	1	24.3333	2	1	1	2	0	0	0	0	0	5.49487
326	0	26.5833	2	1	1	2	0	0	0	0	0	1.49213
327	1	17.9167	1	1	1	3	0	0	0	0	0	6.63655
328	1	76.5	4	1	1	1	0	0	1	0	0	6.09446
329	1	42.6667	3	1	3	1	0	0	0	0	0	6.83368
330	1	53.3333	3	0	1	1	0	0	0	0	0	5.92471
331	0	54.6667	3	0	1	1	1	0	0	1	0	3.52088
332	0	38.9167	2	0	2	1	0	0	0	0	0	6.17933
333	0	29.5833	2	0	3	2	0	0	0	0	0	5.44011
334	1	54.5833	3	0	2	2	1	1	1	1	0	6.49418
335	1	61.5	3	0	3	1	0	0	0	0	0	5.30869
336	0	29.5	2	0	1	2	0	0	0	0	0	3.36482
337	1	56	3	0	3	1	0	0	0	0	0	6.70773
338	1	20.3333	2	1	1	1	0	0	0	0	0	4.97741
339	1	13.1667	1	0	1	2	0	0	0	0	0	5.4976
340	0	55.4167	3	0	1	1	0	0	0	0	0	2.78166
341	0	48.3333	3	1	2	1	0	0	0	1	0	6.80082
342	1	30.3333	2	0	2	1	0	0	0	0	0	6.38467
343	1	65.8333	4	1	3	1	0	1	0	1	0	5.24846
344	0	62.3333	3	1	1	1	0	0	1	0	0	3.11567
345	0	36.1667	2	1	2	1	0	0	0	0	0	4.67899
346	1	42.5833	3	1	2	3	0	0	0	0	0	3.64408
347	0	45.8333	3	1	3	1	1	0	1	0	0	4.40794
348	0	65.4167	4	1	2	1	1	1	0	2	0	2.51335
349	0	26.75	2	1	2	1	0	0	1	0	0	4.30938
350	0	35.5833	2	1	3	1	0	0	0	0	0	4.41889
351	1	47.25	3	0	3	1	0	0	0	0	0	5.81793
352	1	61.75	3	1	2	2	0	0	0	0	0	5.03491
353	1	21.6667	2	0	1	2	0	0	0	0	0	6.8063
354	0	29.25	2	0	1	1	0	0	0	0	1	2.78439
355	1	49.0833	3	1	1	1	0	0	0	0	0	4.82136
356	0	28	2	1	3	1	0	0	0	0	0	4.84326
357	1	38.5	2	0	2	1	0	0	0	0	0	4.71184
358	0	48.75	3	0	2	1	0	0	1	0	0	3.32649
359	0	30.1667	2	0	1	2	0	0	0	0	0	5.66188
360	0	47.9167	3	1	3	1	0	0	1	0	0	6.33265
361	0	67.5	4	0	1	1	1	1	0	1	0	2.87201
362	1	62.9167	3	0	1	2	0	0	0	0	0	6.62834
363	0	59.75	3	1	3	1	0	0	0	0	0	1.21834
364	1	25.1667	2	1	1	1	0	0	0	0	0	6.705
365	1	72.5	4	0	1	1	1	0	1	1	0	4.98289
366	1	42.5833	3	1	3	1	0	0	0	0	0	5.3963
367	0	42.4167	3	0	3	1	0	0	0	0	0	6.39562
368	1	22.25	2	1	1	1	0	0	0	0	0	3.92334
369	0	41	3	1	3	1	0	0	0	0	0	5.11978
370	0	60.0833	3	0	1	1	1	1	0	0	0	1.4757
371	1	61.5	3	0	1	2	1	0	1	2	0	4.39151
372	1	25.8333	2	1	2	2	0	0	0	0	0	6.32444
373	1	38.75	2	0	2	2	0	0	0	0	0	6.82546
374	1	55.25	3	1	3	2	0	0	0	0	0	4.54483
375	0	54.5833	3	1	1	1	1	0	0	1	0	6.09719
376	0	23.1667	2	0	1	1	0	0	0	0	0	3.34839
377	0	39.1667	2	1	2	1	1	1	0	1	0	4.61875
378	0	33.4167	2	1	3	1	0	0	0	0	0	5.36893
379	0	30.0833	2	0	3	1	0	0	0	0	0	6.30801
380	0	27.4167	2	0	2	2	0	0	1	0	0	2.80082
381	1	61	3	1	3	1	0	0	1	0	0	4.89802
382	0	13.75	1	0	1	1	0	0	0	0	0	5.90554
383	1	20.5833	2	0	1	1	0	0	0	0	0	5.1718
384	1	30	2	1	3	1	0	0	0	1	0	6.97604
385	1	60.5833	3	1	1	1	1	1	0	1	0	6.16838
386	0	63.0833	3	0	1	1	0	0	0	0	0	5.91376
387	0	13.1667	1	0	1	2	0	0	0	0	0	6.39836
388	0	45.4167	3	0	3	1	0	0	0	0	0	6.91581
389	0	17.8333	1	0	1	1	0	0	0	1	0	3.82204
390	1	31.3333	2	0	3	1	0	0	0	0	0	3.2909
391	1	37.6667	2	0	2	2	0	0	1	0	0	6.72142
392	1	46.4167	3	0	2	1	0	0	1	1	0	4.83231
393	1	49.6667	3	1	2	1	0	0	0	0	0	4.88706
394	0	56.1667	3	1	3	1	0	0	0	1	0	4.7885
395	1	32.9167	2	1	1	2	0	0	0	0	0	6.31622
396	1	50	3	0	1	1	0	0	0	0	0	6.88296
397	1	73.1667	4	0	1	1	1	0	1	1	0	4.8679
398	0	34.75	2	1	3	1	0	0	0	0	0	5.24298
399	0	22.9167	2	0	1	3	0	0	0	0	0	5.34976
400	1	27.3333	2	1	3	2	0	0	0	0	0	3.8412
401	0	52.9167	3	1	3	1	0	0	0	0	0	4.81862
402	1	46	3	1	2	1	0	0	0	0	0	4.65982
403	1	48	3	0	2	1	0	0	0	0	0	2.2423
404	1	45.3333	3	1	3	1	0	0	0	0	0	2.98426
405	0	77.25	4	0	1	1	1	1	0	0	0	4.67899
406	1	46.75	3	1	2	2	0	0	0	1	0	4.04654
407	1	71.5	4	0	1	1	1	1	0	2	0	3.71253
408	1	33.6667	2	0	3	1	0	0	0	0	0	3.65229
409	0	46.5833	3	0	2	1	0	0	1	1	0	1.19097
410	1	66.5833	4	1	2	1	0	0	1	0	0	6.48871
411	1	30.6667	2	1	2	2	0	0	0	0	0	6.83915
412	0	46.5833	3	0	1	3	0	0	0	0	0	6.43669
413	1	42.75	3	0	2	1	0	1	1	1	0	2.23409
414	1	38.25	2	1	3	3	0	0	0	0	0	4.48734
415	1	37.4167	2	0	3	1	0	0	0	0	0	6.44216
416	1	20.5	2	0	1	1	0	0	0	0	0	4.56947
417	0	45.25	3	0	1	1	0	0	0	0	0	5.20465
418	0	35.9167	2	0	3	1	0	0	0	0	0	6.5681
419	0	69.5	4	0	1	1	0	1	0	0	0	4.33949
420	1	17.4167	1	0	1	1	0	0	0	0	0	4.59138
421	0	49.8333	3	1	2	1	0	0	0	0	0	5.03491
422	1	53.25	3	1	3	1	0	1	1	2	0	5.97947
423	0	43.8333	3	0	1	2	0	0	0	0	0	4.47639
424	0	70.6667	4	1	2	1	1	1	0	1	0	5.28405
425	1	46.5833	3	1	1	2	1	1	0	1	0	5.86721
426	0	87.1667	4	1	1	1	1	0	0	0	0	3.88227
427	0	32.8333	2	0	1	1	0	0	0	0	0	6.3655
428	0	46	3	0	1	1	1	0	0	1	0	3.42505
429	0	19.1667	1	1	1	1	0	0	0	0	0	4.26557
430	1	82.4167	4	1	1	1	0	0	1	1	0	4.73374
431	1	75.1667	4	0	1	3	1	1	1	1	0	3.32649
432	1	50.6667	3	1	3	1	0	0	1	0	0	6.76523
433	0	61.75	3	0	2	2	1	0	0	0	0	6.66667
434	1	54.6667	3	1	1	1	0	0	1	0	0	5.39904
435	1	38.5	2	0	2	1	0	0	1	1	0	3.72074
436	0	50.5833	3	0	2	1	1	1	0	0	0	3.77276
437	0	20.4167	2	0	1	1	0	0	0	0	0	6.24504
438	0	58.4167	3	1	1	3	0	0	1	0	0	6.88843
439	0	23.0833	2	0	1	2	0	0	0	0	0	6.78439
440	1	17.9167	1	1	1	1	0	0	0	0	0	6.97878
441	0	22.9167	2	0	1	1	0	0	0	0	0	4.77755
442	1	38.9167	2	0	2	1	0	0	0	0	0	6.64203
443	1	26	2	1	2	1	0	0	0	0	0	5.64545
444	1	26.3333	2	1	2	1	0	0	0	0	0	2.7488
445	1	33.5	2	0	2	1	0	0	0	0	0	5.93566
446	0	41.5	3	0	2	2	0	0	1	0	0	1.68378
447	0	40.1667	3	0	1	1	0	0	1	0	0	5.65092
448	0	48.4167	3	0	2	1	0	1	0	0	0	5.72758
449	0	17.8333	1	1	1	1	0	0	0	0	0	4.65708
450	0	16.8333	1	0	1	2	0	0	0	0	0	3.26078
451	1	35	2	1	3	1	0	0	0	0	0	6.80356
452	1	51.5833	3	0	3	1	1	0	0	1	0	3.50445
453	0	68.1667	4	0	1	1	0	1	0	0	1	0.783025
454	0	40.3333	3	0	1	1	0	0	0	0	0	5.38535
455	0	53.8333	3	0	1	1	0	0	0	1	0	2.29979
456	1	50	3	1	1	2	0	0	0	0	0	4.846
457	0	42.9167	3	1	3	1	0	0	0	0	0	3.05544
458	0	28.9167	2	1	3	1	0	0	0	0	0	4.54483
459	1	63.0833	3	0	3	2	1	0	1	2	0	5.67556
460	0	13.4167	1	1	1	1	0	0	0	0	0	2.84463
461	0	19.9167	1	0	1	2	0	0	0	0	0	4.03559
462	0	25.0833	2	0	1	2	0	0	0	0	0	3.85216
463	1	38.4167	2	1	2	2	0	0	0	0	0	4.67899
464	1	53.4167	3	1	3	1	1	1	0	1	0	5.28405
465	0	28.5833	2	1	1	1	0	0	0	0	0	3.97536
466	1	68.0833	4	1	1	1	0	0	0	0	0	1.9165
467	1	57.6667	3	0	1	1	0	0	1	0	1	6.11088
468	0	39.5833	2	1	2	1	0	0	1	0	0	3.64408
469	0	38.9167	2	1	2	2	0	0	0	0	0	1.64271
470	0	42.6667	3	0	2	1	0	0	0	0	0	6.53251
471	0	14.6667	1	0	1	1	0	0	0	0	0	4.87611
472	1	37.6667	2	0	3	1	0	0	0	1	0	6.82546
473	0	41.75	3	1	3	1	0	0	0	0	0	4.64613
474	0	79.5833	4	1	2	2	1	0	0	1	0	5.58795
475	1	13.25	1	0	1	1	0	0	0	0	0	4.79945
476	1	57.4167	3	1	1	2	1	0	0	0	0	5.73306
477	0	44.0833	3	0	2	1	0	0	0	0	0	4.42437
478	1	69.1667	4	0	1	2	0	0	0	2	0	6.37645
479	1	30.0833	2	0	3	1	0	0	0	0	0	5.30595
480	0	26.6667	2	1	2	2	0	0	1	0	0	5.53593
481	0	19.25	1	0	1	1	0	0	0	0	0	3.27173
482	0	66.5833	4	1	1	1	0	0	1	1	0	5.80972
483	0	58.9167	3	1	1	1	1	0	0	2	0	3.9206
484	0	44.3333	3	0	2	2	1	0	0	0	0	6.64203
485	1	26.4167	2	1	1	1	0	0	0	0	0	4.63244
486	1	13.9167	1	1	1	2	0	0	0	0	0	5.68378
487	1	83.75	4	0	1	2	0	0	0	0	0	3.70979
488	0	71	4	1	1	1	0	0	0	0	0	2.07529
489	0	63.4167	3	0	2	1	0	0	0	0	0	5.88364
490	0	51.75	3	0	2	2	0	1	0	0	0	4.20534
491	1	29.4167	2	0	2	1	0	0	0	0	0	4.86242
492	1	18.5	1	1	1	1	0	0	0	0	0	2.43669
493	0	80.1667	4	0	1	1	1	1	0	0	0	2.38741
494	0	48.5833	3	1	2	1	0	0	0	0	0	5.94387
495	0	30.8333	2	1	1	2	0	0	0	0	0	5.43737
496	1	14.5833	1	1	1	1	0	0	0	0	0	4.34771
497	0	13.3333	1	0	1	1	0	0	0	0	0	4.3258
498	0	58.8333	3	0	2	1	0	0	0	0	0	5.02122
499	0	45.25	3	0	1	1	0	0	0	0	0	3.44422
500	1	33.6667	2	0	3	1	0	0	0	0	0	3.79466
501	0	69.25	4	0	1	1	0	0	0	1	0	4.58042
502	0	47.6667	3	0	3	1	0	0	0	0	0	6.06434
503	1	15.5833	1	1	1	1	0	0	0	1	0	3.74812
504	1	64.8333	3	0	1	1	0	0	0	1	0	5.18549
505	1	22.9167	2	0	2	1	0	0	0	0	0	6.46954
506	1	31.75	2	0	1	1	0	0	0	0	0	5.70842
507	1	36	2	0	2	2	0	0	0	0	0	2.94593
508	0	51	3	0	1	1	0	0	0	0	0	4.54483
509	0	56.25	3	1	2	2	0	0	0	0	0	2.52977
510	0	42.6667	3	1	3	1	0	0	0	0	0	2.58727
511	1	81.3333	4	1	1	1	1	0	1	1	0	3.0308
512	1	44.1667	3	1	2	1	1	1	0	2	0	3.29637
513	0	51.4167	3	0	1	2	0	0	0	0	0	6.2642
514	1	71.25	4	1	2	3	0	0	1	1	1	2.90212
515	1	14	1	1	1	1	0	0	0	0	0	4.34771
516	1	51.9167	3	0	3	1	0	0	0	1	0	3.6386
517	0	28	2	1	2	2	0	1	0	2	0	3.45243
518	1	13.5	1	0	1	1	0	0	0	0	0	5.80151
519	1	20.3333	2	1	2	1	0	0	0	0	0	5.1937
520	0	28.6667	2	0	2	1	0	0	0	0	0	4.22724
521	1	41.6667	3	0	1	1	0	0	0	1	0	5.11978
522	1	42.25	3	0	1	1	0	0	0	0	0	6.23135
523	1	38.3333	2	1	3	1	0	0	0	0	0	3.76728
524	0	30.5	2	1	3	1	0	0	0	0	0	4.63518
525	0	59	3	0	1	1	0	0	0	0	0	3.19507
526	1	56.5833	3	1	1	1	0	0	0	0	0	1.49213
527	1	59.8333	3	1	1	3	0	0	1	0	0	3.35387
528	0	48.8333	3	0	3	1	0	0	1	0	0	2.72142
529	1	51.4167	3	1	1	1	0	0	0	0	0	6.2423
530	1	43.5	3	1	2	1	0	0	0	1	0	5.99589
531	1	44.1667	3	0	3	1	0	0	0	0	0	6.66667
532	0	45.4167	3	0	3	1	0	0	1	0	0	2.96783
533	0	40.9167	3	1	2	1	0	0	0	0	0	4.1013
534	1	61.0833	3	0	1	1	1	1	1	1	0	5.91376
535	0	43.9167	3	1	2	1	1	0	1	0	0	3.98631
536	1	27	2	1	3	1	0	0	0	0	0	6.89938
537	0	52.5833	3	0	1	1	0	0	1	1	0	4.32307
538	1	80.9167	4	1	1	2	1	0	0	0	0	3.75633
539	0	53	3	0	1	1	1	0	1	0	0	5.49487
540	1	31.0833	2	1	3	2	0	0	0	0	0	6.90212
541	1	22.5833	2	0	1	2	0	0	0	0	0	6.64476
542	1	49	3	0	1	1	0	0	1	0	0	6.01506
543	0	47.4167	3	0	3	1	0	0	1	1	0	6.06434
544	1	45	3	1	3	1	0	0	0	0	0	4.62697
545	1	72.6667	4	0	1	1	0	0	0	0	0	4.59959
546	1	75.9167	4	1	1	1	1	0	0	2	0	6.29979
547	0	43.9167	3	1	3	1	0	0	0	0	0	5.18275
548	0	16.9167	1	0	1	1	0	0	0	0	0	2.55989
549	1	77.9167	4	0	2	1	1	0	1	2	0	4.47639
550	0	43	3	0	3	1	0	0	0	0	0	6.59001
551	1	41.0833	3	1	1	1	0	0	0	0	0	5.43737
552	1	42.0833	3	1	2	1	1	0	1	0	0	5.67283
553	1	28.0833	2	1	3	1	0	0	0	0	0	3.91239
554	0	17.9167	1	1	1	1	0	0	0	0	0	4.71732
555	1	72.4167	4	1	1	1	0	0	0	0	0	4.87064
556	1	28.75	2	0	2	1	0	0	1	0	0	6.54894
557	1	84.25	4	1	1	2	0	0	0	0	0	6.79535
558	0	54.1667	3	0	1	2	0	0	1	1	0	4.29843
559	1	54.6667	3	0	3	1	0	0	1	0	0	2.50787
560	0	16.0833	1	0	1	1	0	0	0	0	0	3.0883
561	1	56.9167	3	0	1	1	0	0	0	0	0	6.6256
562	0	15.6667	1	0	1	1	0	0	0	0	0	6.42026
563	0	65.1667	4	1	1	2	1	1	0	0	0	6.47775
564	0	54.9167	3	0	3	1	0	0	0	1	0	2.43395
565	1	37.5	2	0	1	1	0	0	1	0	0	6.90212
566	0	49.5	3	0	2	1	1	1	1	0	0	1.4538
567	0	48.0833	3	0	2	1	1	1	0	0	0	6.54346
568	1	50.75	3	1	3	1	1	1	0	0	0	2.22313
569	0	49.75	3	0	3	1	0	0	0	0	0	4.89802
570	1	15.5	1	1	1	1	0	0	0	0	0	5.5989
571	1	40.9167	3	1	3	2	0	0	0	0	0	6.17112
572	0	41.25	3	0	1	2	0	0	1	1	0	4.44901
573	0	14.9167	1	0	1	2	0	0	0	1	0	5.24025
574	1	36.3333	2	0	1	1	0	0	1	0	0	2.31075
575	1	45.0833	3	1	2	1	0	0	0	0	0	5.48118
576	1	51.6667	3	1	3	2	1	0	0	0	0	4.80493
577	0	43.25	3	0	1	1	0	0	0	0	0	6.46133
578	1	41.6667	3	1	3	1	0	0	0	0	0	4.27105
579	0	36.9167	2	0	2	2	0	0	0	0	0	6.30801
580	0	61.5	3	1	1	1	1	0	0	2	0	6.59548
581	1	47.5833	3	0	2	1	0	0	0	0	0	4.79398
582	1	18.6667	1	1	1	2	0	0	0	0	0	6.45311
583	0	67.9167	4	1	1	3	0	0	1	0	0	2.72416
584	1	13.9167	1	0	1	2	0	0	0	0	0	3.52635
585	1	30.9167	2	1	2	1	0	0	0	0	0	5.12526
586	1	14.4167	1	1	1	2	0	0	0	0	0	5.25394
587	0	49.25	3	0	2	1	0	0	1	0	0	2.29706
588	1	72.8333	4	1	2	2	0	0	1	0	0	4.04654
589	1	44.5	3	0	1	2	1	0	0	1	0	6.51882
590	0	47.5	3	0	2	2	0	0	0	2	0	5.19644
591	0	25.5	2	1	1	1	0	0	0	0	0	4.90349
592	1	75.0833	4	1	2	2	1	0	1	0	0	5.96304
593	1	59.8333	3	0	1	1	0	1	0	0	0	5.78508
594	0	43.5	3	1	3	2	0	0	0	0	0	4.71458
595	0	34.9167	2	0	1	1	0	0	1	1	0	4.79124
596	1	79	4	0	2	1	1	1	1	2	0	1.86174
597	1	13.1667	1	0	1	1	0	0	0	0	0	5.95483
598	1	28.9167	2	1	1	1	0	0	0	0	0	2.0835
599	1	25.25	2	0	1	1	0	0	1	0	0	6.26968
600	1	55.9167	3	0	1	1	0	0	0	0	0	6.27789
601	0	48.6667	3	0	1	1	0	0	0	1	0	5.68925
602	1	40.3333	3	0	3	1	0	0	0	0	0	6.49692
603	0	45.1667	3	0	1	1	0	0	1	0	0	5.69473
604	0	39.8333	2	1	2	1	0	0	0	0	0	5.43737
605	1	58.8333	3	1	3	1	0	1	0	2	0	6.16838
606	0	57.5833	3	0	2	2	0	0	0	0	0	6.20123
607	1	51.3333	3	0	1	1	0	0	0	0	0	6.75702
608	0	34.4167	2	0	3	2	0	0	0	0	0	2.65572
609	0	34.3333	2	1	2	1	0	1	0	1	0	5.9384
610	0	50.5833	3	0	1	1	0	0	0	0	0	4.19165
611	1	28	2	0	1	1	0	0	0	0	0	6.04517
612	1	23.9167	2	1	1	2	0	0	0	0	0	5.34428
613	1	38.4167	2	0	1	1	0	0	0	0	0	6.0397
614	1	19.4167	1	0	1	3	0	0	1	0	0	6.43943
615	0	44.25	3	0	2	1	0	0	1	0	0	6.423
616	0	58.3333	3	0	2	1	0	0	0	1	0	3.72895
617	0	80.75	4	1	2	2	1	0	1	1	0	4.03833
618	1	75.5833	4	0	1	1	1	0	0	0	0	4.30116
619	1	28.8333	2	0	1	2	0	0	1	0	0	6.49418
620	0	29.3333	2	1	3	1	0	0	0	0	0	3.40315
621	0	54.9167	3	0	1	1	0	0	0	0	0	5.29227
622	0	52	3	0	2	1	0	0	0	1	0	6.62286
623	0	79.8333	4	0	1	1	1	1	1	1	0	4.13415
624	1	43.25	3	0	3	1	0	0	0	0	0	6.08898
625	1	27.5833	2	1	2	1	0	0	1	0	0	5.18823
626	1	68.25	4	1	2	2	0	0	1	0	0	5.43463
627	0	38.25	2	1	2	1	0	0	0	0	0	4.73648
628	0	28.5	2	1	3	1	0	0	0	0	0	4.03833
629	0	41	3	1	3	1	1	0	0	0	0	3.88775
630	1	55.8333	3	0	1	1	0	0	0	0	0	2.14921
631	0	44.1667	3	0	2	3	0	1	0	0	0	6.97878
632	1	62.4167	3	1	3	1	0	0	0	0	0	6.68309
633	0	65.75	4	0	1	2	1	1	0	1	0	3.8768
634	0	54.1667	3	0	1	1	1	0	1	1	0	2.24504
635	1	36.75	2	1	2	1	0	0	0	0	0	6.48049
636	0	56.5	3	0	1	2	0	0	1	1	0	6.95688
637	0	62	3	1	1	1	1	0	0	0	0	4.15058
638	1	19.9167	1	0	1	1	0	0	0	0	0	5.96304
639	0	31.25	2	0	3	1	0	0	0	0	0	4.21081
640	0	68.4167	4	1	1	1	1	0	0	0	0	4.61602
641	1	24.1667	2	0	1	1	0	0	0	0	0	4.57769
642	0	13.5833	1	0	1	2	0	0	0	1	0	3.35661
643	0	78.75	4	0	1	2	1	0	1	1	0	1.8809
644	1	32.75	2	0	1	1	0	0	0	0	0	3.52361
645	0	26.5	2	1	2	1	0	1	1	0	0	6.92676
646	1	52.25	3	0	3	1	0	0	1	1	0	6.57358
647	1	69.5833	4	0	1	1	0	0	0	1	0	6.40383
648	1	31.6667	2	0	3	2	0	0	0	1	0	5.6564
649	1	39.75	2	0	1	2	0	0	0	0	0	4.71732
650	0	80.5833	4	1	2	1	1	0	0	1	0	2.68036
651	0	53.9167	3	1	2	1	0	0	0	0	0	4.8104
652	0	56.4167	3	0	2	2	0	0	0	1	0	5.28953
653	1	39.1667	2	1	2	1	0	1	1	1	0	3.46064
654	1	47.75	3	0	1	2	0	0	0	0	0	6.99521
655	0	53.0833	3	1	2	1	0	0	0	0	0	4.24641
656	1	36.4167	2	1	2	1	0	0	0	1	0	5.14442
657	0	42.0833	3	0	2	1	0	0	0	0	0	3.88501
658	1	51.9167	3	0	2	3	0	0	0	0	0	4.48734
659	0	76.5833	4	0	1	1	1	0	1	0	0	3.80561
660	0	25.8333	2	1	1	2	0	0	0	0	0	6.93771
661	1	19.4167	1	0	1	2	0	0	0	1	0	4.24093
662	1	18.8333	1	0	1	1	0	0	0	0	0	5.21287
663	1	28.8333	2	0	2	2	0	0	0	0	0	4.64887
664	1	27.6667	2	0	2	1	0	0	0	0	0	4.32307
665	1	17	1	0	1	1	0	0	1	0	0	5.57153
666	1	55.5833	3	0	1	3	1	1	0	0	0	5.74127
667	0	16.75	1	0	1	2	0	0	0	0	0	2.58179
668	0	48.4167	3	1	1	2	0	0	0	0	0	4.07392
669	0	60	3	1	1	1	0	0	0	1	0	2.37372
670	1	32.25	2	0	3	1	0	0	0	0	0	4.47639
671	0	55.5	3	0	1	1	1	1	0	0	0	6.71869
672	1	65	4	1	1	2	0	0	0	1	0	6.60917
673	1	58.3333	3	1	1	1	0	1	0	0	0	5.60712
674	0	48.9167	3	0	2	2	0	0	0	1	0	4.9473
675	0	54.5833	3	0	3	1	0	1	0	0	1	3.15674
676	0	71.4167	4	1	1	2	0	0	1	0	0	6.05065
677	0	83.0833	4	1	1	1	1	0	0	2	0	0.736482
678	0	47.1667	3	0	1	2	0	0	0	0	0	2.81177
679	1	25.5	2	0	1	2	0	0	0	0	0	5.10883
680	1	20	2	0	1	3	0	0	0	0	0	6.03696
681	1	35.3333	2	0	3	1	0	0	0	0	0	6.58453
682	1	71.1667	4	1	1	1	0	0	0	0	0	5.80972
683	1	18.75	1	0	1	1	0	0	0	0	0	4.94182
684	0	30.6667	2	0	3	1	0	0	0	0	0	5.22108
685	1	60.3333	3	1	1	1	0	0	0	0	0	2.14921
686	0	39.3333	2	1	2	1	0	0	1	0	0	4.84873
687	1	48.75	3	1	3	1	1	0	0	1	0	3.49076
688	1	36.75	2	0	2	1	0	0	0	0	0	5.57974
689	0	59	3	1	3	1	0	0	0	0	0	2.36003
690	0	18.5	1	0	1	2	0	0	0	0	0	5.05133
691	0	47.3333	3	0	1	3	0	0	0	1	0	4.32854
692	1	15.5833	1	0	1	2	0	0	0	0	0	1.1499
693	0	43.25	3	0	3	1	0	0	0	0	0	6.5462
694	1	43.5833	3	1	2	1	0	0	0	0	0	6.17933
695	1	48	3	1	2	2	0	0	0	0	0	2.83368
696	1	36.1667	2	0	1	1	0	0	0	0	0	2.3217
697	0	57.5	3	1	3	2	1	1	0	0	0	3.94798
698	0	61.5	3	1	1	2	0	0	0	2	0	5.38809
699	1	30.0833	2	0	1	2	0	0	0	0	0	5.41273
700	1	44.8333	3	0	2	1	0	0	0	0	0	4.41889
701	1	55.5833	3	0	2	1	0	0	1	0	1	0.00273785
702	0	34.5833	2	1	2	1	0	0	0	0	0	6.51061
703	1	53.3333	3	0	1	1	0	0	0	0	0	4.05202
704	1	66.4167	4	0	1	2	0	1	0	1	0	4.29021
705	0	71.5833	4	0	2	1	1	1	0	1	0	5.42368
706	1	21	2	0	1	1	0	0	0	0	0	5.09788
707	1	58.3333	3	0	3	1	0	0	0	0	0	3.84668
708	1	61.4167	3	1	2	1	0	0	0	1	0	3.36482
709	0	13.5	1	0	1	1	0	0	0	0	0	6.33812
710	0	55.75	3	1	3	2	0	0	0	1	0	6.40383
711	0	75.4167	4	1	1	1	1	1	0	2	0	1.86174
712	0	19.9167	1	1	1	1	0	0	0	0	0	5.82615
713	1	18.4167	1	0	1	2	0	0	0	0	0	3.58932
714	0	58.0833	3	0	2	1	1	0	1	0	0	6.99521
715	1	14.25	1	1	1	1	0	0	0	0	0	3.22793
716	1	48.6667	3	0	1	2	0	0	1	0	0	6.74606
717	0	34.25	2	0	2	1	0	0	0	0	0	6.57632
718	1	18.1667	1	1	1	1	0	0	0	0	0	4.82683
719	0	57.75	3	1	3	1	1	1	0	0	0	3.61944
720	0	28.6667	2	0	1	1	0	0	0	0	0	6.38467
721	1	62.8333	3	1	1	1	1	1	1	1	0	2.87748
722	1	30.9167	2	1	3	1	0	0	0	0	0	4.17522
723	1	33.5	2	0	1	1	0	0	0	0	1	4.84052
724	0	14	1	1	1	1	0	0	0	0	0	4.92813
725	1	55.0833	3	1	1	1	0	0	0	1	0	3.59206
726	0	51.3333	3	0	3	1	0	0	0	0	0	2.04244
727	0	39.1667	2	1	2	2	0	0	0	0	0	4.93361
728	0	15.4167	1	0	1	1	0	0	0	0	0	4.10951
729	0	43.25	3	1	3	1	0	0	0	0	0	5.7796
730	0	18.0833	1	0	1	2	0	0	1	1	0	6.141
731	1	14.25	1	0	1	2	0	0	0	0	0	2.97057
732	1	59.1667	3	1	3	1	0	0	0	0	0	5.11157
733	0	40.4167	3	1	2	1	0	0	0	0	0	6.66667
734	0	67.5833	4	0	1	1	1	0	1	0	0	5.62902
735	1	52.6667	3	1	2	2	0	0	0	2	0	4.73648
736	1	33.4167	2	1	1	1	0	0	0	0	0	6.95414
737	0	27.5	2	1	1	1	0	0	0	0	0	6.38193
738	0	42.6667	3	0	2	2	0	0	0	0	0	4.85147
739	1	30.6667	2	0	1	1	0	0	0	0	0	5.14716
740	1	37.5	2	0	1	1	0	0	0	1	0	2.67762
741	0	51.9167	3	0	2	1	0	0	1	0	0	4.17796
742	0	51.25	3	1	2	1	1	1	0	0	0	6.56537
743	1	54.0833	3	0	2	1	0	0	0	0	0	3.84394
744	1	43.8333	3	0	3	1	0	0	0	2	0	3.47707
745	1	14.5833	1	0	1	1	0	0	0	0	0	3.79192
746	1	33.1667	2	0	3	1	0	0	0	0	0	5.38809
747	1	24.5	2	1	1	2	0	0	0	0	0	2.55715
748	1	16.6667	1	0	1	2	0	0	0	0	0	4.89802
749	1	14.4167	1	0	1	1	0	0	0	0	0	6.48597
750	0	49.8333	3	1	2	1	0	0	0	1	0	2.04244
751	0	26.0833	2	1	3	2	0	0	0	0	0	4.04654
752	1	70.5	4	0	2	1	0	0	1	0	0	4.51472
753	0	57.5833	3	1	3	1	1	0	0	0	0	4.80767
754	1	67.75	4	0	1	1	1	1	1	0	0	1.22656
755	0	13.4167	1	1	1	1	0	0	0	0	0	6.04517
756	0	33.8333	2	0	3	1	0	0	0	0	0	3.3347
757	0	72.4167	4	1	2	1	1	0	1	1	0	4.87064
758	0	27.5833	2	0	2	2	0	0	0	0	0	6.64203
759	1	53.6667	3	0	3	1	0	0	1	1	0	6.87748
760	1	38.5	2	0	2	2	0	0	0	0	1	5.91376
761	1	49	3	0	3	1	0	0	0	0	0	5.40452
762	1	21.0833	2	0	1	2	0	0	0	0	0	6.6037
763	1	30.5833	2	0	3	1	0	0	0	0	0	6.6037
764	1	19.3333	1	1	1	1	0	0	0	0	0	5.82341
765	0	49.25	3	0	2	1	0	0	1	0	0	6.10815
766	1	21.3333	2	0	1	2	0	0	0	0	0	4.37235
767	0	43.3333	3	0	1	1	0	0	0	0	0	6.04791
768	0	78.1667	4	1	1	3	0	0	0	0	0	2.28063
769	0	13.3333	1	0	1	2	0	0	0	0	0	5.98768
770	1	23.1667	2	1	1	2	0	0	0	0	0	5.17454
771	1	51.6667	3	1	3	2	0	0	0	0	0	4.01095
772	1	56.1667	3	1	3	2	1	0	1	1	0	6.3655
773	0	76.3333	4	1	1	1	1	0	1	1	0	5.56605
774	0	50	3	1	1	1	1	1	0	0	0	2.31075
775	1	46.5	3	0	1	1	0	0	0	0	0	6.85558
776	1	16.0833	1	1	1	1	0	0	0	0	0	4.83778
777	0	19.8333	1	1	1	2	0	0	0	0	0	3.64956
778	0	42.4167	3	0	1	1	0	0	0	0	0	6.9514
779	1	29.9167	2	0	1	2	0	0	1	0	0	6.38467
780	1	24.1667	2	0	1	1	0	0	0	0	0	4.51745
781	1	64.1667	3	0	3	1	1	0	0	0	0	6.83094
782	0	48.5	3	0	3	1	0	0	0	0	0	4.98289
783	0	34.4167	2	0	1	2	0	0	0	0	0	3.03354
784	0	37.9167	2	0	1	2	0	0	0	0	0	4.85421
785	0	61.25	3	1	3	1	1	0	1	0	0	2.85558
786	0	26.6667	2	0	2	1	0	0	0	0	0	5.64819
787	0	26.8333	2	0	2	2	0	0	0	0	0	4.31485
788	0	31.5	2	1	2	2	0	0	0	1	0	4.58042
789	0	18	1	1	1	2	0	0	0	0	0	3.88501
790	1	16.75	1	0	1	1	0	0	0	0	0	6.58179
791	0	42.5833	3	1	3	2	0	0	0	0	0	6.81451
792	0	42.4167	3	1	3	1	1	0	0	0	0	4.05476
793	1	79.4167	4	1	1	1	0	0	1	0	0	1.16085
794	1	29.5833	2	0	1	1	0	0	0	0	0	3.75359
795	0	62.5833	3	0	2	2	0	0	0	0	0	5.08145
796	0	33.5833	2	1	3	2	0	0	0	0	0	6.39562
797	0	44.1667	3	1	3	1	0	0	0	0	0	6.05613
798	0	26.5833	2	1	1	1	0	0	0	0	0	3.59754
799	1	66.75	4	1	2	1	1	0	0	0	0	4.69541
800	0	31.9167	2	0	1	2	0	0	1	0	0	1.68925
801	0	68.6667	4	0	1	2	0	1	1	1	0	3.13758
802	1	26.5833	2	1	1	2	0	0	1	0	0	6.50513
803	1	56	3	0	1	1	0	0	0	0	0	6.39562
804	0	43.0833	3	1	1	1	0	0	0	0	0	5.54141
805	1	69.6667	4	1	2	2	0	0	0	0	0	3.2115
806	1	35.75	2	0	3	1	0	0	0	0	0	4.35044
807	0	64.8333	3	0	2	1	1	0	0	1	0	6.1629
808	1	69.9167	4	0	2	2	0	0	0	0	0	3.58111
809	1	23.8333	2	0	2	1	0	0	0	0	0	6.68857
810	0	26.5	2	1	1	1	1	0	0	0	0	6.94045
811	1	31.1667	2	0	3	1	0	0	1	0	0	2.54346
812	1	19.25	1	0	1	2	0	0	0	0	0	5.66735
813	0	36	2	1	2	2	0	0	0	0	0	6.64476
814	0	17.75	1	1	1	1	0	0	0	0	0	6.71869
815	1	48.0833	3	1	2	2	1	0	0	1	0	6.85284
816	0	46.25	3	1	2	1	0	0	0	0	0	4.81314
817	0	7.25	1	1	1	1	0	0	0	1	0	5.78782
818	0	33.4167	2	0	1	1	0	0	0	0	0	2.00684
819	1	16	1	0	1	1	0	0	0	0	0	4.0794
820	0	24.8333	2	0	1	1	0	0	0	0	0	6.38467
821	1	47.75	3	1	2	1	0	0	0	0	0	5.69473
822	0	6.41667	1	1	1	1	0	0	0	0	0	5.5332
823	0	52.3333	3	1	3	2	1	1	0	0	0	4.48734
824	0	44.5833	3	0	1	1	0	0	0	0	0	5.85626
825	1	23.8333	2	0	1	1	0	0	0	0	0	6.91581
826	0	49.1667	3	1	1	2	0	0	0	1	0	3.76728
827	1	22.6667	2	0	1	2	0	0	0	0	0	4.06845
828	0	52.1667	3	1	3	2	1	0	0	0	0	6.42026
829	0	49.8333	3	0	2	1	0	0	0	0	0	5.44285
830	0	48.1667	3	0	3	1	0	0	1	0	0	5.45106
831	0	17.5	1	1	1	1	0	0	0	0	0	5.0924
832	0	62.0833	3	1	1	2	0	0	0	0	0	5.50034
833	1	85	4	1	1	1	1	0	0	2	0	3.46338
834	0	47.3333	3	1	2	1	1	1	0	0	0	5.2512
835	0	31.5833	2	1	1	1	0	0	0	0	0	5.66188
836	1	34.25	2	0	2	2	0	1	0	1	0	6.83368
837	0	56.5833	3	0	1	1	0	0	0	0	0	5.15264
838	0	44.6667	3	1	2	2	0	0	1	0	0	4.14784
839	1	39.5	2	1	2	1	0	0	0	0	0	6.19302
840	0	77.1667	4	0	1	1	1	0	1	2	0	5.27858
841	1	48.5833	3	0	2	3	0	0	0	0	0	3.09377
842	1	54.3333	3	0	2	1	1	0	0	2	0	3.36756
843	1	81.75	4	0	1	1	0	0	0	0	0	3.20055
844	0	23.4167	2	1	3	2	0	0	0	0	0	1.6345
845	1	67	4	0	1	3	1	1	0	0	0	3.19233
846	0	62.25	3	1	3	1	0	1	0	1	0	6.2642
847	1	14.5	1	0	1	2	0	0	0	0	0	6.59001
848	0	29.5833	2	0	2	1	0	0	0	0	0	4.28747
849	0	18.9167	1	1	1	1	0	0	0	0	0	3.6742
850	0	49.8333	3	1	1	2	0	0	1	0	0	5.2512
851	1	24.75	2	0	1	1	0	0	0	0	0	2.89391
852	1	50.1667	3	1	2	2	0	0	0	0	0	3.90418
853	0	42.6667	3	1	3	1	0	0	0	0	0	2.58727
854	1	22.1667	2	0	1	1	0	0	0	0	0	3.5373
855	1	36.75	2	1	2	3	0	0	1	0	0	2.88296
856	1	46.5833	3	1	2	1	0	0	0	0	0	5.57974
857	1	52.5833	3	0	2	1	0	0	1	1	0	3.54825
858	1	40.8333	3	1	2	1	0	0	0	0	0	4.06297
859	1	25.25	2	1	1	1	0	0	0	0	0	5.13073
860	0	16	1	1	1	1	0	0	0	0	0	6.34634
861	0	56.8333	3	0	2	2	0	0	0	0	0	4.64066
862	1	29.1667	2	0	2	1	0	0	0	0	0	5.90554
863	1	56.4167	3	0	2	1	0	0	1	1	1	4.2026
864	0	35.4167	2	0	3	1	0	0	0	0	0	6.44216
865	1	56.0833	3	0	1	2	0	0	1	1	0	3.37029
866	1	58.9167	3	1	2	1	0	0	0	0	0	3.8412
867	1	82	4	1	1	1	1	0	0	0	0	2.99247
868	1	15.8333	1	1	1	2	0	0	0	0	0	5.21013
869	0	60.75	3	1	2	1	0	0	0	0	0	5.06776
870	1	50.9167	3	0	1	1	0	0	0	0	0	2.39288
871	0	28.0833	2	1	2	1	0	0	0	0	0	6.71047
872	0	79.9167	4	0	2	2	1	1	0	1	0	4.15606
873	0	56.5	3	1	1	2	0	0	0	0	0	6.67488
874	1	54.0833	3	0	3	2	0	0	0	0	0	6.21218
875	0	16.5833	1	0	1	1	0	0	0	0	0	6.52704
876	0	30.75	2	0	2	1	0	0	0	1	0	4.67625
877	0	45.8333	3	1	3	1	0	0	0	0	0	6.47502
878	0	45.6667	3	0	2	1	0	0	0	0	0	6.39836
879	1	59.5	3	0	1	1	1	1	0	1	0	4.3833
880	1	54	3	0	2	1	0	0	0	0	1	2.2423
881	0	46.0833	3	1	2	2	0	0	0	0	0	6.97878
882	1	42.0833	3	1	3	2	0	0	1	0	0	6.36003
883	1	79.9167	4	0	1	2	1	1	0	2	0	3.27721
884	0	80.5833	4	0	1	2	1	0	1	1	0	4.20808
885	1	13.25	1	0	1	1	0	0	0	0	0	3.78645
886	0	49.25	3	1	2	1	0	0	1	1	0	3.31554
887	0	60.4167	3	0	1	1	0	0	0	0	0	5.27036
888	1	24	2	1	2	2	0	0	1	0	0	5.24846
889	1	51.75	3	0	3	1	0	0	1	1	0	6.90212
890	0	50.0833	3	1	2	1	0	0	0	0	0	3.64956
891	0	26.8333	2	0	2	1	0	0	0	0	0	4.1013
892	1	41.1667	3	0	2	1	0	0	1	0	0	4.06571
893	1	26.8333	2	0	2	1	0	0	1	0	0	5.40452
894	0	43.25	3	0	1	2	0	0	0	0	0	6.46133
895	0	39	2	1	3	1	0	0	1	1	0	6.60096
896	0	34.9167	2	0	2	2	0	0	1	1	0	1.60438
897	0	55.3333	3	0	2	1	0	0	0	1	0	5.34428
898	0	58.1667	3	1	3	2	1	0	1	0	0	5.15811
899	0	38.5	2	1	2	2	0	0	0	0	0	2.79808
900	0	18.8333	1	0	1	2	0	0	0	0	0	5.39904
901	0	33.6667	2	0	1	1	0	0	1	0	0	5.00479
902	1	66.25	4	0	1	1	1	0	0	0	0	3.0089
903	0	30.6667	2	1	3	1	0	0	0	0	0	4.74196
904	0	19.3333	1	1	1	3	0	0	0	0	0	6.423
905	1	77.6667	4	0	2	3	1	0	0	1	0	6.48871
906	1	38.0833	2	0	1	2	0	0	0	0	0	6.61191
907	0	45	3	0	2	1	0	0	0	0	0	4.96099
908	1	52.0833	3	1	3	1	0	0	0	0	0	6.92129
909	0	35.5	2	0	2	1	0	0	1	0	0	4.08214
910	1	56.4167	3	0	1	1	0	0	1	0	1	6.44216
911	1	49.5833	3	1	3	1	0	0	0	1	0	5.77139
912	1	28.8333	2	0	3	1	0	0	0	0	0	6.17112
913	0	62.5	3	1	2	1	0	0	0	0	0	6.25051
914	0	69.5833	4	1	1	2	0	0	1	2	0	6.67214
915	0	34.9167	2	1	3	1	0	0	1	0	0	6.48049
916	0	22.5833	2	1	1	1	0	0	0	0	0	6.11088
917	0	38.1667	2	1	3	1	0	0	0	0	0	2.28063
918	1	51.9167	3	1	2	1	0	0	0	0	0	4.73648
919	1	46.9167	3	1	3	2	0	0	0	0	0	6.90212
920	0	42.9167	3	0	2	1	0	0	1	0	0	5.50308
921	1	25.5	2	0	2	1	0	0	0	0	0	4.94182
922	0	23.5833	2	1	1	1	0	0	0	0	0	6.84189
923	1	42.5	3	1	3	3	0	0	1	0	0	6.28611
924	0	47.75	3	0	2	1	1	1	0	0	0	5.48118
925	1	21.8333	2	0	1	1	0	0	0	0	0	2.10267
926	0	55.5833	3	0	3	1	0	0	0	0	0	5.16906
927	0	57.9167	3	0	3	1	0	0	0	2	0	4.1807
928	0	61	3	1	3	1	0	0	1	2	0	6.22861
929	1	72.6667	4	0	1	1	0	1	0	1	0	4.37235
930	1	62	3	0	1	2	0	0	0	0	0	6.83368
931	0	68.3333	4	1	1	1	0	0	0	1	0	6.88022
932	1	37.3333	2	0	3	2	0	0	0	0	0	5.60986
933	1	31.6667	2	0	1	1	0	0	0	0	0	3.50445
934	1	30.5833	2	0	2	1	0	0	0	0	0	4.36687
935	1	75.5	4	0	1	1	1	0	1	1	0	6.05065
936	0	51.5833	3	0	3	1	0	0	0	0	0	5.64545
937	1	14	1	0	1	1	0	0	0	2	0	6.43669
938	1	67.0833	4	1	1	1	1	0	1	1	0	5.22929
939	1	52.8333	3	0	2	1	0	0	1	0	1	3.96988
940	1	30.25	2	1	1	2	0	0	0	0	0	5.19644
941	0	62.4167	3	0	1	1	1	1	1	0	0	6.87748
942	0	48.0833	3	1	2	1	1	0	0	0	0	6.89938
943	1	76.8333	4	1	1	1	1	0	1	2	0	3.30459
944	1	27.75	2	1	1	3	0	0	1	1	0	2.58179
945	1	20.8333	2	1	1	1	0	0	1	1	0	4.86516
946	1	19.0833	1	1	1	1	0	0	0	0	0	5.86448
947	1	27.5833	2	0	2	2	0	0	0	0	0	6.3436
948	0	75.4167	4	1	1	2	0	0	1	1	0	3.25257
949	0	45.75	3	1	3	1	1	1	0	0	0	6.69131
950	1	60.0833	3	0	2	2	0	0	0	0	0	1.4757
951	0	22.5833	2	0	1	2	0	0	0	0	0	5.04312
952	1	26.9167	2	0	2	1	0	0	0	0	0	3.23888
953	0	44.25	3	1	3	1	0	0	0	0	0	6.67214
954	1	16.0833	1	1	1	1	0	0	0	0	0	5.63723
955	1	21.5	2	0	1	1	0	0	0	0	0	4.59685
956	1	56.1667	3	0	1	1	0	0	0	0	0	3.0883
957	0	23.25	2	0	1	2	0	0	0	0	0	5.31143
958	0	47.6667	3	1	1	1	0	0	0	0	0	3.54004
959	0	78.5	4	0	2	3	1	0	0	2	0	6.65845
960	0	57.5833	3	1	3	1	1	0	0	2	0	4.87611
961	1	29.9167	2	0	1	2	0	0	0	0	0	6.57358
962	1	17.4167	1	1	1	1	0	0	0	0	0	4.98289
963	1	57.75	3	0	1	2	0	0	1	0	0	1.07598
964	1	45.6667	3	0	1	1	1	0	1	1	0	5.8809
965	1	55.4167	3	1	1	1	0	0	0	0	0	4.77481
966	1	54.4167	3	1	3	1	1	0	1	0	0	4.64066
967	0	20.5	2	0	1	1	0	0	0	0	0	6.32444
968	1	13.1667	1	0	1	2	0	0	0	0	0	4.02464
969	1	23.75	2	1	2	1	0	0	1	0	0	4.96646
970	0	57.5833	3	1	2	3	0	1	1	1	0	3.57837
971	0	19.8333	1	1	1	2	0	0	0	0	0	6.49418
972	1	44.4167	3	1	3	1	0	1	0	0	0	2.98426
973	0	53.25	3	1	3	2	0	0	0	0	0	4.00821
974	1	16.4167	1	0	1	2	0	0	0	0	0	6.05886
975	0	36.5833	2	1	3	1	0	0	1	0	0	6.91581
976	1	13.3333	1	1	1	3	0	0	0	0	0	6.33265
977	1	56.4167	3	1	3	1	1	1	1	2	1	2.18207
978	1	26.9167	2	0	1	1	0	0	0	0	0	5.91923
979	0	17	1	1	1	1	0	0	0	0	0	5.48118
980	0	68.9167	4	1	1	2	0	0	1	0	0	5.53046
981	1	22.5	2	1	1	1	0	0	0	0	0	6.49692
982	0	61.3333	3	0	1	1	0	0	0	0	0	4.48186
983	1	55.5	3	1	1	1	0	0	0	0	0	6.99521
984	1	26.3333	2	0	2	1	0	0	1	0	0	6.73785
985	0	47.9167	3	1	3	1	0	0	0	0	0	4.67899
986	0	56.0833	3	1	1	1	0	0	0	0	0	6.11088
987	1	35.5833	2	0	2	2	0	0	0	0	0	6.48871
988	1	31.5833	2	0	3	1	0	0	0	0	0	6.2423
989	0	56	3	1	1	2	1	1	0	2	0	5.69199
990	0	45.3333	3	1	3	2	0	0	0	0	0	6.91855
991	1	27.3333	2	0	1	1	0	0	0	0	0	4.42437
992	1	33.0833	2	1	2	1	0	0	0	0	0	5.52225
993	1	33.9167	2	0	2	1	0	0	0	0	0	4.98563
994	1	66.1667	4	0	1	2	1	1	1	1	0	6.141
995	1	56.5833	3	0	2	3	0	0	0	0	0	4.93634
996	1	39.6667	2	1	2	1	0	0	0	0	0	4.73101
997	1	32.75	2	0	1	1	0	0	0	0	0	4.06023
998	0	39.4167	2	1	3	1	0	0	0	0	0	4.67077
999	0	71.1667	4	0	1	1	1	0	0	2	0	1.84257
1000	1	31.75	2	1	3	2	0	0	1	0	0	5.55236
1001	1	46.1667	3	1	1	1	0	0	0	0	0	6.97878
1002	1	63	3	1	1	1	1	1	1	0	0	5.48118
1003	0	13.3333	1	0	1	1	0	0	0	0	0	5.60986
1004	0	52.8333	3	0	3	1	0	0	0	1	0	2.18207
1005	1	77.6667	4	1	1	1	1	0	1	2	0	6.05613
1006	0	52.6667	3	0	1	1	0	0	0	0	0	4.97741
1007	1	36.4167	2	0	3	2	0	0	1	0	0	1.64819
1008	1	29.25	2	0	2	1	0	0	0	1	0	6.13279
1009	0	29.1667	2	1	3	1	0	0	1	0	0	4.74196
1010	0	22.6667	2	1	2	1	0	0	0	0	0	3.08008
1011	0	53.8333	3	0	2	2	0	0	0	0	0	2.97331
1012	0	57.5833	3	0	2	1	0	0	0	0	0	4.11225
1013	0	35.25	2	1	3	2	0	0	0	0	0	5.99589
1014	1	37.6667	2	1	2	2	0	0	1	1	0	4.61875
1015	1	22	2	1	1	1	0	0	0	0	0	5.10883
1016	1	38.3333	2	1	2	1	0	0	0	0	0	3.98357
1017	1	41.4167	3	1	1	1	0	0	0	0	0	4.13142
1018	1	20.5833	2	1	1	1	0	0	0	0	0	1.84531
1019	1	67.3333	4	1	1	1	0	0	1	2	0	1.47844
1020	0	43.1667	3	0	3	2	0	0	0	1	0	6.66393
1021	1	41.0833	3	1	3	1	0	1	0	0	0	1.69199
1022	0	60.25	3	1	2	2	0	0	0	0	0	5.82615
1023	1	20.5	2	0	1	1	0	0	0	0	0	5.66735
1024	0	50.5	3	0	2	1	0	0	0	0	0	1.6783
1025	0	56.75	3	1	1	1	1	0	1	0	0	4.77481
1026	1	39.5	2	1	2	1	0	0	0	1	0	5.4538
1027	1	63.1667	3	0	1	1	0	0	0	0	0	6.4668
1028	1	54.6667	3	1	3	1	0	0	1	0	0	2.51882
1029	0	33.9167	2	1	1	1	0	0	0	0	0	3.55647
1030	0	47.4167	3	0	1	1	0	0	0	0	1	6.82546
1031	1	51.75	3	1	2	1	1	0	0	2	0	2.1629
1032	1	61.6667	3	1	1	2	0	1	0	0	0	1.18549
1033	1	39.1667	2	0	1	1	0	0	1	0	0	4.72553
1034	1	33.5833	2	1	3	2	0	0	0	0	0	6.39562
1035	0	75.4167	4	0	1	2	0	0	1	1	0	3.58385
1036	1	42.1667	3	1	3	1	0	0	0	0	0	5.7796
1037	1	39.3333	2	0	1	1	0	0	0	0	0	6.92676
1038	1	28.0833	2	0	3	1	0	0	0	0	0	5.78234
1039	1	39.6667	2	1	3	2	0	0	0	0	0	5.08693
1040	1	38.6667	2	1	3	1	0	0	0	0	0	2.71047
1041	0	46.1667	3	0	2	1	1	1	1	2	0	5.94387
1042	1	33.3333	2	1	2	1	0	0	0	0	0	6.66667
1043	1	43.6667	3	0	1	1	0	0	0	0	0	5.8152
1044	1	22.6667	2	1	2	1	0	0	0	0	0	4.71458
1045	0	34.75	2	0	1	2	0	0	0	0	0	4.90075
1046	1	54	3	1	1	1	0	0	0	0	0	6.0616
1047	0	35.5	2	1	3	1	0	0	0	0	0	2.71595
1048	0	22.8333	2	1	1	2	0	0	0	0	0	3.3128
1049	0	57.9167	3	1	2	1	0	0	0	0	0	5.97673
1050	0	44	3	0	3	1	0	0	0	0	0	6.88296
1051	0	43.5833	3	1	1	1	0	0	1	1	0	6.6694
1052	0	53.25	3	0	3	1	0	0	1	1	0	5.87817
1053	0	54.0833	3	0	1	2	0	0	0	1	0	6.705
1054	0	33.0833	2	1	3	1	0	0	0	0	0	4.61054
1055	0	29.1667	2	1	3	1	0	0	0	0	0	6.0178
1056	1	14.6667	1	0	1	1	0	0	0	0	0	5.38809
1057	0	60.8333	3	1	1	2	1	0	0	0	0	3.52909
1058	0	19.4167	1	0	1	1	0	0	0	0	0	4.24093
1059	0	28.5833	2	0	1	1	0	0	0	0	0	2.51061
1060	0	15.75	1	0	1	1	0	0	0	0	0	2.87748
1061	0	72.6667	4	0	1	1	0	1	0	1	0	2.24504
1062	1	22.25	2	0	1	1	0	0	1	0	0	6.77618
1063	1	13.4167	1	1	1	1	0	0	0	0	0	6.04517
1064	0	53	3	0	1	3	0	0	0	0	0	6.57084
1065	1	74.0833	4	1	1	1	0	0	0	1	0	6.84189
1066	1	60.1667	3	1	3	1	0	0	0	0	0	6.47228
1067	1	59.1667	3	0	3	1	0	0	1	0	0	1.87543
1068	1	26.4167	2	1	2	1	0	0	0	1	0	6.00137
1069	1	14.3333	1	0	1	1	0	0	0	0	0	6.78439
1070	0	81.4167	4	0	2	2	1	0	0	0	0	5.28131
1071	1	57.8333	3	1	1	2	1	1	1	1	0	6.89938
1072	1	28.25	2	0	1	3	0	0	0	0	0	3.82478
1073	0	43.3333	3	0	3	1	0	0	0	0	0	2.25325
1074	1	43.75	3	1	2	1	0	0	0	0	0	5.00479
1075	1	13.75	1	0	1	2	0	0	0	0	0	6.51608
1076	0	49.9167	3	0	1	2	1	0	1	1	0	6.24778
1077	1	54.4167	3	0	2	1	0	0	1	0	0	2.14648
1078	1	46.0833	3	1	3	2	1	0	0	1	0	4.17796
1079	1	77.25	4	1	1	1	1	1	0	0	0	5.11157
1080	1	38.5833	2	1	1	2	0	0	0	0	0	3.25804
1081	1	15.8333	1	1	1	1	0	0	0	0	0	6.3655
1082	1	30.9167	2	0	1	1	0	0	1	0	0	0.495551
1083	0	76.1667	4	0	1	1	1	1	1	1	0	6.0178
1084	1	31	2	0	3	1	0	0	0	0	0	5.93018
1085	0	26	2	0	1	1	0	0	0	0	0	5.32238
1086	1	50	3	1	2	2	0	0	0	0	0	5.64819
1087	0	33.3333	2	1	1	1	0	0	0	0	0	4.53936
1088	1	57.6667	3	0	1	1	0	0	1	1	0	5.3306
1089	1	49.0833	3	0	3	2	0	0	0	0	0	6.31348
1090	0	14.25	1	1	1	1	0	0	0	0	0	6.34086
1091	1	30.5833	2	0	2	2	0	0	0	0	0	3.6961
1092	0	31.5833	2	1	2	1	0	0	0	0	0	5.66188
1093	0	12.25	1	0	1	1	0	0	0	0	0	5.48118
1094	1	37.0833	2	1	1	1	0	1	0	0	0	5.84257
1095	1	46.0833	3	1	3	1	0	0	0	0	0	6.72964
1096	1	57.3333	3	0	2	2	0	1	0	2	0	3.41136
1097	0	40.25	3	1	3	2	0	0	0	0	0	4.84052
1098	1	27.25	2	0	3	2	0	0	1	0	0	5.94387
1099	0	66.5833	4	1	1	2	1	0	0	0	0	6.26146
1100	0	24.1667	2	1	1	1	0	0	0	0	0	6.49692
1101	1	52.6667	3	1	3	1	0	0	0	1	0	6.68857
1102	1	58.4167	3	0	2	1	0	1	1	1	0	5.30869
1103	1	17.6667	1	0	1	1	0	0	0	0	0	4.35318
1104	1	25.5	2	0	1	2	0	0	0	0	0	5.53593
1105	0	13.6667	1	1	1	1	0	0	0	0	0	5.40726
1106	1	30.5833	2	0	2	3	0	0	0	0	0	2.45311
1107	0	51.1667	3	1	3	1	0	1	0	1	0	6.00137
1108	0	14.0833	1	1	1	2	0	0	0	0	0	4.75565
1109	1	48.5833	3	1	2	3	0	0	0	0	0	4.78576
1110	1	51.0833	3	1	3	2	0	0	1	0	0	4.21903
1111	0	62.6667	3	0	1	1	0	0	0	1	0	1.57974
1112	1	16.75	1	1	1	1	0	1	0	1	0	3.97536
1113	1	52.1667	3	0	2	2	0	0	0	0	0	4.69541
1114	0	32.0833	2	1	1	1	0	0	0	0	0	5.31417
1115	1	56.9167	3	1	1	1	1	0	1	0	0	6.51882
1116	0	23.5833	2	0	1	2	0	0	0	0	0	6.31896
1117	1	68.5833	4	1	1	3	1	1	0	0	0	4.85969
1118	1	76.5	4	1	1	1	0	0	0	0	0	6.99247
1119	0	22.1667	2	0	1	2	0	0	1	0	0	4.97467
1120	1	63.25	3	1	1	2	1	0	1	0	0	4.83778
1121	0	47.4167	3	1	1	1	0	0	0	0	0	6.2423
1122	0	18.6667	1	1	1	1	0	0	0	0	0	3.43326
1123	0	44.6667	3	0	3	1	0	0	0	0	0	6.45311
1124	0	69.75	4	1	1	1	1	1	1	2	0	5.10335
1125	1	49	3	0	1	1	0	0	1	0	0	3.83299
1126	1	45.0833	3	0	1	1	0	0	1	0	0	6.14921
1127	0	20.75	2	0	1	2	0	0	0	0	0	5.68378
1128	1	56.8333	3	1	3	1	0	0	0	0	0	4.75291
1129	0	17.5833	1	1	1	2	0	0	0	0	0	4.69815
1130	1	38.4167	2	1	3	1	0	0	0	1	0	6.89117
1131	1	25.8333	2	0	2	2	0	0	0	0	0	4.19986
1132	1	19.8333	1	0	1	3	0	0	0	0	0	6.89391
1133	0	16.0833	1	0	1	1	0	0	0	0	0	2.88296
1134	1	36.5833	2	0	3	1	0	0	0	0	0	6.93498
1135	0	35	2	0	1	1	0	0	0	0	0	6.83094
1136	0	60.5	3	1	3	2	1	1	1	1	0	3.78371
1137	1	34.5833	2	0	3	1	0	0	0	0	0	4.78029
1138	1	51.5	3	1	3	1	0	0	0	0	0	6.88296
1139	0	21.3333	2	1	1	2	0	0	0	0	0	5.70842
1140	1	18.5	1	0	1	1	0	0	0	0	0	4.41068
1141	1	66	4	0	1	1	0	1	0	0	0	6.02875
1142	0	35.6667	2	0	3	1	0	0	0	0	1	0.621492
1143	0	59.3333	3	0	1	1	0	0	0	0	0	6.66393
1144	1	36.1667	2	0	1	1	0	0	0	0	0	6.20671
1145	0	76.4167	4	1	1	1	0	1	1	1	0	3.76728
1146	1	60.9167	3	1	3	1	0	0	0	1	0	6.46954
1147	0	82.0833	4	1	1	2	1	0	0	1	0	3.42231
1148	0	22.8333	2	0	1	2	0	0	0	0	0	6.53799
1149	0	53	3	1	3	1	0	0	0	0	0	6.4011
1150	0	13.1667	1	1	1	1	0	0	0	0	0	5.3306
1151	1	59.75	3	0	2	1	0	0	0	0	0	6.30253
1152	0	13.5	1	0	1	2	0	0	0	0	0	2.14648
1153	0	19.75	1	0	1	1	0	0	0	0	0	3.60027
1154	0	25.1667	2	0	1	1	0	0	0	0	0	3.38946
1155	0	46.1667	3	0	2	1	0	0	0	0	0	6.48323
1156	1	42.8333	3	1	1	1	1	0	0	0	0	5.25667
1157	0	39.8333	2	0	1	2	0	0	0	0	0	3.41136
1158	0	55.1667	3	1	3	1	0	0	0	1	0	5.9603
1159	1	30.3333	2	0	2	2	0	0	0	0	0	3.1321
1160	0	19.25	1	0	1	2	0	0	0	0	0	5.90554
1161	1	29	2	0	1	2	0	0	1	0	0	3.20329
1162	1	57.6667	3	0	3	1	1	1	1	1	0	2.58453
1163	1	46.5833	3	1	1	1	0	1	0	1	0	4.4052
1164	1	49.0833	3	0	3	1	0	0	1	0	0	5.90554
1165	1	14.3333	1	0	1	2	0	0	0	0	0	6.75428
1166	0	24.3333	2	0	2	1	0	0	0	0	0	4.846
1167	1	19.4167	1	1	1	1	0	0	0	0	0	4.90897
1168	0	45	3	1	1	2	0	0	0	0	0	3.64956
1169	1	15.75	1	1	1	1	0	0	0	0	0	4.96372
1170	1	54.25	3	0	3	1	1	0	1	0	0	3.17864
1171	0	29.0833	2	0	2	2	0	0	1	0	0	6.97057
1172	1	59.9167	3	0	2	1	1	0	0	1	0	3.02259
1173	0	35.0833	2	0	2	1	0	0	0	0	0	6.53251
1174	1	57.4167	3	1	1	1	0	0	0	0	0	5.39357
1175	0	41.1667	3	1	3	1	0	0	0	2	0	2.75154
1176	0	57.4167	3	0	3	1	0	0	1	0	0	6.60917
1177	0	33.3333	2	1	1	1	0	0	0	0	0	6.97057
1178	1	13.9167	1	1	1	2	0	0	0	0	0	6.87748
1179	0	76	4	0	1	2	1	1	0	1	0	2.2204
1180	0	19.6667	1	0	1	1	0	0	0	0	0	5.30322
1181	0	68.25	4	1	1	2	1	0	0	0	0	5.28131
1182	0	41.0833	3	0	1	1	0	0	0	0	0	5.50308
1183	1	39.4167	2	1	3	1	0	0	0	0	0	3.90965
1184	1	19.9167	1	0	1	1	0	0	0	0	0	3.89049
1185	1	59	3	0	1	1	0	0	1	1	0	2.64203
1186	1	35.4167	2	1	2	2	0	0	0	0	0	4.49829
1187	1	28.5	2	1	2	1	0	0	0	0	0	4.53662
1188	1	37.1667	2	0	3	2	0	0	0	0	0	5.6564
1189	1	54.0833	3	1	1	2	1	0	1	0	0	1.62902
1190	1	50.5833	3	0	1	1	0	0	0	1	0	4.19165
1191	0	56.25	3	0	3	1	0	0	0	0	0	5.9822
1192	0	39	2	0	1	1	0	0	1	0	0	3.83573
1193	0	45.3333	3	1	3	1	0	0	0	0	0	4.31211
1194	0	42.8333	3	1	3	1	0	0	0	0	0	6.16564
1195	0	60.6667	3	0	1	3	0	0	0	0	0	4.19713
1196	0	36.75	2	0	2	1	0	0	0	0	0	5.3306
1197	0	37.5833	2	0	3	1	0	0	0	0	0	5.09788
1198	1	44.75	3	0	2	2	0	0	1	0	0	4.6872
1199	1	61.5833	3	1	3	1	1	0	1	0	0	3.49076
1200	1	16	1	0	1	1	0	0	0	0	0	6.79808
1201	0	57.9167	3	0	1	1	0	0	1	1	0	4.71184
1202	0	81.6667	4	1	1	1	1	0	1	1	0	3.92334
1203	0	44.1667	3	1	3	1	0	0	1	0	0	6.705
1204	0	14.1667	1	0	1	2	0	0	0	0	0	5.56605
1205	1	63.0833	3	0	1	1	0	0	0	0	0	5.91376
1206	1	49.25	3	1	3	1	0	0	0	0	0	3.96441
1207	0	45.0833	3	1	2	1	1	0	1	1	0	6.19849
1208	1	54.3333	3	0	1	1	1	0	0	0	0	6.37645
1209	0	28	2	0	2	1	0	0	0	0	0	2.0616
1210	0	54.1667	3	0	1	2	0	0	0	0	0	2.25873
1211	1	50.25	3	0	3	2	0	0	0	0	0	3.91239
1212	0	55.6667	3	0	1	1	0	0	0	0	0	5.68925
1213	0	21.1667	2	1	1	2	0	0	0	0	0	4.6872
1214	0	66.6667	4	1	1	2	0	0	0	2	0	5.85626
1215	0	30.5833	2	0	2	2	0	0	0	0	0	4.65161
1216	0	59.6667	3	1	3	1	1	0	0	1	0	1.77413
1217	1	33.3333	2	0	3	1	0	0	1	0	0	3.04997
1218	1	23.1667	2	0	1	2	0	0	0	0	0	5.70568
1219	0	49.8333	3	1	3	1	0	0	0	0	0	4.76934
1220	0	42.75	3	0	2	1	0	0	0	0	0	2.23409
1221	1	42	3	0	2	2	0	0	0	0	0	4.46817
1222	0	17.3333	1	0	1	2	0	0	0	0	0	6.89665
1223	0	18.5	1	0	1	2	0	0	0	0	0	5.42368
1224	0	60.3333	3	1	2	1	0	0	0	0	0	3.38946
1225	1	47.5833	3	1	3	1	0	0	1	0	0	6.24504
1226	1	25.5	2	1	2	1	0	0	0	1	0	5.21561
1227	0	42.0833	3	1	1	1	0	0	0	0	0	6.89938
1228	0	41.8333	3	0	3	2	0	0	1	1	1	1.03217
1229	1	29.4167	2	0	3	1	0	0	0	0	0	4.93634
1230	1	25.6667	2	1	1	1	0	0	0	0	1	3.77002
1231	1	30	2	1	1	2	0	0	0	0	0	6.27789
1232	0	32.9167	2	0	1	2	0	0	0	0	0	6.70226
1233	0	22.3333	2	0	2	1	0	0	0	0	0	6.94045
1234	0	69.5	4	1	1	2	1	0	1	2	0	6.52704
1235	0	69.9167	4	0	2	2	0	0	1	0	0	6.23135
1236	0	34.5	2	0	3	1	0	0	0	1	0	6.73785
1237	1	42.25	3	1	2	1	0	0	1	0	0	3.2115
1238	0	34.5	2	0	1	1	0	0	1	0	0	4.68994
1239	1	58.3333	3	0	2	2	0	1	0	0	0	4.64887
1240	1	49.25	3	0	3	1	0	0	0	0	0	6.64203
1241	1	54.8333	3	1	2	1	1	1	1	1	0	6.00137
1242	1	82.8333	4	1	1	1	1	0	1	1	0	6.94045
1243	0	35.25	2	1	2	2	0	0	1	1	0	6.21766
1244	0	39.25	2	0	1	1	0	0	1	0	0	4.29021
1245	1	32.3333	2	1	2	2	0	0	0	1	0	6.93224
1246	1	13.75	1	0	1	1	0	0	0	0	0	5.53593
1247	0	50.5833	3	0	2	1	0	0	0	0	0	6.28063
1248	1	22.75	2	1	2	2	0	0	0	0	0	5.76044
1249	0	61.75	3	0	2	2	1	0	1	1	0	4.11773
1250	1	58.6667	3	0	3	1	0	0	0	0	0	3.03628
1251	1	15.4167	1	0	1	3	0	0	0	0	0	6.88296
1252	0	57.1667	3	0	2	2	1	0	0	1	0	2.87474
1253	1	37.8333	2	1	3	1	0	0	0	0	0	4.67077
1254	0	52.6667	3	0	1	1	0	0	0	0	0	5.72758
1255	0	94	4	1	1	1	1	0	0	2	0	2.46954
1256	1	44.5833	3	1	2	2	0	0	0	0	0	4.97741
1257	1	48.5	3	0	2	2	0	0	1	1	0	5.00479
1258	1	64	3	1	1	2	0	0	0	0	0	4.61875
1259	1	65.3333	4	0	2	1	0	1	1	1	0	4.11499
1260	0	53.1667	3	0	2	1	0	1	1	1	0	4.26831
1261	0	39.9167	2	1	2	1	0	0	0	0	0	2.89391
1262	0	64.3333	3	1	3	2	0	0	1	1	0	6.19302
1263	1	33.4167	2	1	3	2	0	0	0	0	0	4.96646
1264	0	39.9167	2	0	3	1	0	0	0	0	0	4.3614
1265	1	55.5833	3	0	2	1	1	0	1	0	0	4.44079
1266	1	51.25	3	1	3	2	0	0	0	0	0	6.63929
1267	0	43.1667	3	0	2	1	0	0	1	0	0	5.86721
1268	1	54.3333	3	0	1	1	0	0	0	2	0	3.13758
1269	1	26.8333	2	1	3	2	0	0	0	0	0	5.40452
1270	1	55.6667	3	0	2	1	0	0	0	0	0	5.68925
1271	1	36.25	2	1	2	1	0	0	0	2	0	3.42231
1272	1	27.0833	2	0	3	1	0	0	0	0	0	3.67967
1273	1	77.1667	4	1	1	1	0	0	0	1	1	5.70021
1274	1	27.8333	2	0	1	1	0	0	0	0	0	6.37919
1275	0	30.4167	2	1	1	1	0	0	0	0	0	6.78713
1276	1	45	3	0	2	1	0	0	0	0	0	6.21218
1277	1	35.3333	2	1	2	2	0	0	0	0	0	6.423
1278	1	30.75	2	1	2	2	0	0	0	0	0	6.93498
1279	1	52.4167	3	0	2	1	0	0	0	0	1	6.85832
1280	1	66.75	4	1	2	1	0	0	0	1	0	1.13073
1281	0	68.1667	4	0	1	1	1	0	1	2	0	6.71869
1282	0	74.75	4	0	1	1	1	1	0	0	0	4.75565
1283	0	44.75	3	0	2	1	0	0	0	0	0	2.99247
1284	0	6.75	1	1	1	2	0	0	0	0	0	3.84668
1285	1	35.5	2	1	3	1	0	0	0	0	0	1.70294
1286	1	50.4167	3	0	1	1	0	0	0	0	0	5.53867
1287	0	36.8333	2	0	2	2	0	0	0	0	0	4.01369
1288	0	37.1667	2	0	3	1	0	0	0	0	0	3.82752
1289	0	18.5833	1	1	1	2	0	0	1	0	0	6.16838
1290	1	45.4167	3	0	3	1	0	0	0	0	0	4.34223
1291	0	31.4167	2	0	1	3	0	0	0	0	0	4.49281
1292	1	55.9167	3	0	3	2	0	0	0	0	0	2.01232
1293	1	31.6667	2	0	1	1	0	0	0	0	0	3.09651
1294	0	26.75	2	0	1	1	0	0	0	0	0	4.12047
1295	0	38.8333	2	0	3	1	0	0	0	0	0	4.6078
1296	1	69.5	4	0	1	1	0	0	1	0	0	6.05886
1297	0	67	4	0	1	1	0	0	1	2	0	6.20123
1298	0	51.5833	3	1	3	1	1	1	0	1	0	6.31348
1299	1	47.9167	3	0	3	1	0	0	0	0	0	5.37714
1300	0	65	4	1	1	1	0	0	1	0	0	6.16016
1301	0	67.4167	4	0	1	1	1	1	1	0	0	6.53251
1302	0	20.5833	2	1	1	2	0	0	0	0	0	6.92129
1303	0	22	2	0	1	2	0	0	0	0	0	5.80698
1304	0	20.25	2	1	1	1	0	0	0	0	0	3.64408
1305	0	79.4167	4	1	1	1	0	0	1	2	0	3.81656
1306	1	13.25	1	0	1	2	0	0	0	0	0	2.61465
1307	0	33.25	2	1	3	2	0	0	0	0	0	3.16496
1308	0	63.75	3	0	2	3	0	0	0	1	0	5.40178
1309	1	35.6667	2	1	1	1	0	0	0	0	0	1.67556
1310	1	54.9167	3	0	2	2	1	0	0	2	0	4.61875
1311	0	82.5833	4	1	2	1	1	1	1	2	0	3.46886
1312	1	26.6667	2	1	1	1	0	0	0	1	0	4.06297
1313	1	52.6667	3	1	2	1	0	1	0	2	0	5.82615
1314	0	59.1667	3	0	2	1	0	1	0	1	0	2.89391
1315	0	30.5	2	0	1	1	0	0	0	1	0	6.99521
1316	1	42.8333	3	1	3	2	0	0	0	0	0	6.94867
1317	0	17.4167	1	0	1	2	0	0	0	0	0	3.02806
1318	1	34.5833	2	1	2	1	0	0	0	0	0	6.51061
1319	1	54.6667	3	0	2	1	0	0	0	0	0	5.5989
1320	0	57.9167	3	0	2	1	0	1	0	1	0	3.44422
1321	1	46.9167	3	0	2	1	0	0	0	0	0	3.14305
1322	0	70.75	4	1	1	3	0	0	1	0	0	6.95414
1323	0	71.0833	4	0	2	2	1	0	1	0	0	6.07529
1324	0	44.9167	3	1	3	1	0	0	0	0	0	5.9822
1325	0	14.3333	1	0	1	1	0	0	0	0	0	3.3128
1326	1	29.1667	2	0	1	1	0	0	1	0	0	4.98289
1327	0	23.9167	2	1	3	1	0	1	0	0	0	6.8501
1328	1	43.0833	3	0	2	2	0	0	0	0	0	2.83094
1329	1	16.1667	1	0	1	1	0	0	0	0	0	5.44285
1330	0	54.6667	3	0	1	2	0	0	1	0	0	5.0486
1331	0	59.0833	3	1	1	1	1	0	0	0	0	2.03149
1332	1	31.9167	2	1	2	1	0	0	0	0	0	4.07392
1333	1	28.6667	2	0	1	1	0	0	0	0	0	4.77481
1334	1	30.9167	2	0	1	1	0	0	1	0	0	6.72964
1335	1	26.8333	2	0	1	2	0	0	0	0	0	4.31485
1336	0	37.0833	2	1	3	1	0	0	0	0	0	6.01506
1337	1	34.6667	2	1	2	3	0	0	0	0	0	6.10541
1338	0	44.5833	3	1	1	2	0	0	1	0	0	6.07803
1339	1	30.0833	2	0	2	1	0	0	1	0	0	4.52567
1340	1	36.4167	2	0	2	1	0	0	1	0	0	4.90897
1341	0	42.9167	3	1	2	1	0	0	0	0	0	4.6872
1342	1	65.3333	4	0	1	2	0	0	0	0	0	5.80424
1343	0	69.3333	4	1	1	1	0	0	0	2	0	5.36893
1344	0	77.8333	4	0	2	2	1	0	1	1	0	3.9206
1345	1	79.8333	4	1	1	1	1	0	1	1	0	3.11567
1346	0	23.0833	2	1	1	1	0	0	0	0	0	6.09719
1347	0	50.1667	3	0	2	1	0	1	0	0	0	3.41136
1348	1	63.5	3	0	1	1	0	0	1	1	0	3.57837
1349	0	65.75	4	0	1	1	0	1	0	1	0	4.77207
1350	1	31	2	1	3	1	0	0	0	0	0	6.4668
1351	0	70.5833	4	1	2	1	0	0	0	1	0	4.41889
1352	0	52.0833	3	1	1	1	0	0	1	0	0	4.47365
1353	0	22.6667	2	0	1	1	0	0	1	0	0	4.17796
1354	0	37.3333	2	1	1	1	0	0	1	0	0	5.86721
1355	1	47.4167	3	0	1	1	0	0	0	0	0	6.15195
1356	0	46.1667	3	0	3	1	0	0	0	0	0	5.59617
1357	0	27.5	2	1	3	1	0	0	0	0	0	4.33128
1358	0	52.75	3	0	1	1	0	0	0	0	0	5.68378
1359	1	42.75	3	1	2	2	0	0	0	0	0	6.87748
1360	0	46.5833	3	0	1	1	0	0	1	0	0	4.8898
1361	1	17.1667	1	1	1	1	0	0	0	0	0	6.34634
1362	1	13.9167	1	1	1	1	0	0	0	0	0	3.90144
1363	0	30.9167	2	0	3	2	0	0	0	0	0	6.52977
1364	0	37.5833	2	0	2	1	0	0	0	0	0	2.51061
1365	0	36.5	2	1	3	1	0	0	0	1	0	5.72485
1366	0	38.4167	2	0	1	2	0	0	0	0	0	5.77139
1367	0	30.5	2	0	3	1	0	0	0	0	0	4.49555
1368	1	41.0833	3	0	2	2	0	0	0	0	0	5.3963
1369	0	43.0833	3	0	1	1	0	0	1	0	0	6.19849
1370	0	35.75	2	0	1	1	0	0	0	0	0	5.6564
1371	0	26.3333	2	1	3	2	0	0	0	0	0	6.69405
1372	1	43.5	3	1	3	1	0	0	0	0	0	2.29158
1373	1	48.6667	3	0	2	1	0	0	1	1	0	4.44901
1374	1	47.3333	3	0	2	1	0	0	0	0	0	1.5551
1375	0	61.3333	3	1	3	2	1	0	0	0	0	3.19233
1376	1	52.3333	3	0	2	2	1	0	1	0	0	3.1896
1377	1	58.0833	3	0	1	1	1	0	0	0	0	3.37029
1378	0	42.1667	3	1	3	1	0	0	0	0	0	6.94045
1379	0	39	2	1	2	1	0	0	0	0	0	4.45722
1380	1	29.5	2	1	2	1	0	0	0	0	0	3.07734
1381	0	56	3	1	3	2	1	1	0	1	0	6.11362
1382	0	21.1667	2	0	2	1	0	0	0	0	0	6.15195
1383	1	39	2	1	2	1	0	0	0	0	0	4.95551
1384	0	61.4167	3	1	1	1	0	0	0	2	0	5.64819
1385	0	18.9167	1	1	1	1	0	0	0	0	0	6.82546
1386	1	46.0833	3	1	1	2	0	0	0	0	0	1.70294
1387	0	34.0833	2	0	3	1	0	0	0	0	0	3.08282
1388	1	50.3333	3	0	1	1	0	0	0	0	0	6.17385
1389	1	41.1667	3	0	2	1	1	1	1	0	0	6.96783
1390	0	41.3333	3	0	2	1	0	0	0	0	0	6.25051
1391	1	39.8333	2	1	3	1	0	0	0	1	0	3.28816
1392	1	18.0833	1	1	1	2	0	0	0	0	0	6.97878
1393	0	60.75	3	0	3	1	0	0	0	0	0	5.20192
1394	0	28.0833	2	0	2	3	0	0	0	1	0	6.60917
1395	0	58	3	0	3	1	1	0	0	1	0	4.64613
1396	1	25.3333	2	0	1	2	0	0	0	0	0	5.18823
1397	0	52	3	1	3	2	0	0	0	0	0	3.2334
1398	0	34.6667	2	0	2	2	0	0	1	1	0	5.05681
1399	1	40.8333	3	0	3	2	0	0	0	0	0	5.36345
1400	0	69.75	4	0	1	1	0	0	1	1	0	6.49692
1401	0	32.1667	2	1	2	2	0	0	0	0	0	1.39083
1402	0	56.5833	3	0	2	2	0	0	0	0	0	6.81725
1403	0	16.0833	1	0	1	1	0	0	0	0	0	6.63381
1404	0	64.25	3	0	1	2	0	0	0	0	0	4.88706
1405	0	49	3	1	3	2	0	0	0	0	0	6.89665
1406	1	34.3333	2	1	3	2	0	0	0	1	0	6.70226
1407	0	15	1	0	1	2	0	0	0	0	0	5.41547
1408	0	56	3	1	2	3	0	0	0	2	0	5.21561
1409	0	32.6667	2	1	3	2	0	0	0	0	0	6.6037
1410	0	32.0833	2	1	1	1	0	0	0	0	0	6.39014
1411	0	25.1667	2	0	3	2	0	0	0	0	0	6.35455
1412	0	27.75	2	1	2	1	0	0	1	0	0	6.82546
1413	1	15.5	1	1	1	1	0	0	0	0	0	6.22861
1414	0	49.8333	3	0	2	1	0	0	0	0	0	4.57495
1415	0	56.3333	3	1	3	1	0	0	0	1	0	5.28131
1416	1	45.5833	3	0	1	1	0	0	1	0	0	6.12731
1417	0	69.0833	4	0	1	3	1	1	0	0	0	6.71869
1418	1	32.3333	2	1	2	2	0	0	1	1	0	6.96509
1419	1	34.9167	2	1	2	1	0	0	0	0	0	6.61191
1420	0	29.8333	2	0	3	1	0	0	1	0	1	2.99521
1421	0	45.0833	3	1	2	2	0	0	0	0	0	3.6386
1422	0	19.0833	1	1	1	2	0	0	0	0	0	5.08145
1423	0	61.0833	3	0	1	3	0	0	0	0	0	5.91376
1424	1	59.5833	3	1	3	2	1	1	0	1	0	3.43874
1425	1	67.75	4	1	2	3	0	0	0	0	0	4.31485
1426	1	27.5	2	0	1	1	0	0	0	1	0	3.68241
1427	1	72.8333	4	0	3	1	1	0	1	1	0	3.0308
1428	0	31.5833	2	1	3	1	0	0	0	0	0	5.87817
1429	0	27.0833	2	0	2	2	0	0	0	0	0	6.12457
1430	0	66.6667	4	0	1	1	1	1	0	2	0	3.47707
1431	1	77.8333	4	0	1	3	1	1	0	1	0	3.35113
1432	1	57.3333	3	1	1	1	1	1	0	2	0	1.85352
1433	0	37.6667	2	0	1	1	0	0	0	0	0	0.930869
1434	1	25.4167	2	1	1	3	0	0	0	0	0	6.84189
1435	0	40.75	3	0	1	1	0	0	0	0	0	1.64819
1436	1	15.25	1	0	1	1	0	0	1	0	0	4.89802
1437	0	44.1667	3	0	1	2	0	0	1	0	0	6.79535
1438	0	16.6667	1	1	1	1	0	0	0	0	0	4.00548
1439	1	50.4167	3	0	3	1	0	0	1	0	0	6.58453
1440	1	15.1667	1	0	1	2	0	0	0	0	0	4.16701
1441	1	37.9167	2	0	1	2	0	0	1	0	0	1.62081
1442	0	44.9167	3	0	3	2	1	0	0	0	0	5.97673
1443	1	32.5	2	0	1	1	0	0	0	0	0	3.06366
1444	1	45.4167	3	0	1	1	0	1	0	1	0	4.33402
1445	1	81.75	4	0	1	1	1	0	0	2	0	5.68378
1446	1	40.0833	3	1	3	1	0	0	0	0	0	5.3744
1447	0	22	2	0	1	1	0	0	0	0	0	5.62355
1448	0	55.9167	3	1	2	1	0	0	0	0	0	4.67351
1449	1	45.9167	3	0	2	2	0	0	0	1	0	4.87885
1450	0	56.0833	3	1	1	1	0	0	0	0	0	4.97741
1451	1	39	2	1	3	1	0	0	0	0	0	2.83094
1452	1	46.0833	3	0	1	2	0	0	1	0	0	4.84326
1453	1	25.1667	2	0	3	1	0	0	0	0	0	6.74606
1454	0	41.0833	3	1	2	1	0	0	0	0	0	5.55784
1455	0	53.5833	3	1	3	1	0	0	0	0	0	2.67488
1456	1	39.75	2	0	1	1	0	0	0	0	0	2.35455
1457	0	26	2	0	2	2	0	0	0	0	0	4.87611
1458	0	25.4167	2	0	2	1	0	0	0	0	0	5.70842
1459	0	40.4167	3	1	3	2	0	0	0	0	0	5.05407
1460	1	15	1	1	1	3	0	0	0	0	0	5.38535
1461	1	47	3	0	1	1	0	0	0	0	0	6.11362
1462	0	70.0833	4	0	1	1	0	0	1	0	0	3.14579
1463	0	17.0833	1	0	1	2	0	0	0	0	0	3.11841
1464	1	14.5833	1	0	1	1	0	0	0	0	0	5.65366
1465	1	38.75	2	0	3	2	0	0	0	1	0	5.25394
1466	1	26.25	2	1	2	3	0	0	0	0	0	3.70705
1467	0	64.4167	3	0	2	2	0	0	0	0	0	3.27995
1468	1	34.75	2	0	1	1	0	0	0	0	0	4.75291
1469	1	35.8333	2	0	1	2	0	0	0	0	0	5.88364
1470	1	23.9167	2	1	2	2	0	0	0	0	0	6.8501
1471	1	54.0833	3	1	3	2	0	0	0	0	0	3.57563
1472	0	14.25	1	1	1	1	0	0	0	0	0	6.34086
1473	0	32.8333	2	0	2	1	0	0	0	0	0	6.20945
1474	0	39.4167	2	0	2	1	0	0	0	0	0	5.68104
1475	1	53.5833	3	0	2	1	0	0	0	0	0	6.48049
1476	0	65.3333	4	0	2	1	1	0	1	1	0	4.90623
1477	1	18.4167	1	0	1	1	0	0	0	0	0	5.36619
1478	1	79.4167	4	1	1	1	0	1	1	1	1	0.301164
1479	1	62.5	3	1	1	1	0	0	0	1	0	1.88638
1480	0	47.0833	3	0	3	1	0	0	0	0	0	6.65298
1481	0	22.3333	2	0	1	1	0	0	0	0	0	6.14921
1482	1	38.8333	2	0	2	2	0	0	0	0	0	5.83436
1483	0	50.9167	3	0	1	1	1	0	1	0	0	5.07598
1484	1	48.4167	3	0	1	2	0	0	1	0	0	5.05407
1485	0	52.9167	3	0	2	1	0	0	0	0	0	2.20123
1486	0	45	3	0	1	1	0	0	0	1	0	3.55921
1487	1	20.5	2	0	1	1	0	0	0	0	0	5.28131
1488	0	25.6667	2	0	1	3	0	0	1	0	0	5.10062
1489	0	37	2	1	3	1	0	0	0	0	0	6.65845
1490	1	34.6667	2	0	2	2	0	0	1	0	0	4.86516
1491	1	61.0833	3	0	1	1	0	0	1	1	0	3.88501
1492	1	15.75	1	1	1	3	0	0	0	0	0	6.24504
1493	0	40.5833	3	1	3	1	0	0	0	0	0	4.09582
1494	1	51.8333	3	1	1	2	0	0	1	0	0	4.30664
1495	1	44.5	3	1	1	1	0	0	0	0	0	3.19507
1496	0	22.3333	2	1	1	2	1	0	0	1	0	5.85626
1497	0	36	2	0	2	1	0	0	1	0	0	6.3217
1498	0	62.75	3	0	1	1	0	0	0	0	0	6.22313
1499	0	49.4167	3	1	2	2	1	0	0	1	0	1.96578
1500	1	13	1	0	1	2	0	0	0	0	0	4.11773
1501	0	57.5833	3	1	1	2	1	0	0	0	0	5.94935
1502	1	57.75	3	1	3	1	0	0	0	0	0	2.705
1503	1	52.5	3	0	3	2	0	0	0	0	0	3.59206
1504	1	19.5	1	1	1	1	0	0	0	0	0	3.06639
1505	0	33	2	0	2	1	0	0	0	0	0	6.13005
1506	0	45.9167	3	1	2	1	0	0	0	0	0	6.97331
1507	0	21.9167	2	0	1	2	0	0	0	0	0	0.610541
1508	0	21.25	2	1	1	1	0	0	0	0	0	4.02464
1509	1	33.4167	2	0	3	2	0	0	0	0	0	6.35181
1510	1	50.0833	3	0	3	2	0	0	0	0	1	2.45038
1511	1	18.1667	1	1	1	2	0	0	0	0	0	3.50719
1512	1	41.0833	3	1	2	1	0	1	0	1	0	3.68789
1513	0	25.75	2	0	3	1	0	0	0	0	0	2.80903
1514	0	38.5	2	0	1	1	0	0	0	0	0	5.09514
1515	0	33	2	0	1	2	0	0	0	0	0	4.28747
1516	0	56.1667	3	1	1	2	1	0	0	1	0	2.65298
1517	0	58.9167	3	1	3	1	1	0	1	0	0	5.15264
1518	1	19.3333	1	0	1	1	0	0	0	0	0	6.64203
1519	1	26	2	0	1	1	0	0	0	0	0	5.76591
1520	1	33.6667	2	1	2	2	0	0	0	0	0	5.71116
1521	0	15.5	1	0	1	1	0	0	0	0	0	6.02875
1522	1	28	2	0	1	1	0	0	0	0	0	4.96099
1523	1	53.75	3	0	1	1	0	0	0	0	0	3.67967
1524	0	19.75	1	0	1	3	0	0	0	0	0	6.8501
1525	0	48.25	3	1	2	1	0	0	0	0	0	3.98631
1526	0	81.3333	4	1	1	1	1	0	0	1	0	3.30459
1527	0	38	2	0	2	1	0	0	0	0	0	2.85284
1528	1	22.8333	2	0	2	3	0	0	0	0	0	3.57837
1529	1	70.6667	4	1	2	1	0	0	0	0	0	3.42505
1530	1	36.6667	2	0	1	1	0	0	0	0	0	6.00684
1531	1	13.25	1	0	1	2	0	0	0	0	0	5.92471
1532	1	35.25	2	0	1	1	0	0	0	1	0	5.34976
1533	0	63.4167	3	0	2	1	1	0	0	0	0	5.8809
1534	0	35.4167	2	0	3	1	0	0	1	0	0	6.7488
1535	1	45	3	1	3	2	0	0	0	0	0	2.55715
1536	1	14	1	1	1	1	0	0	0	0	0	6.15469
1537	1	72.1667	4	0	1	1	1	0	0	2	0	4.41615
1538	1	35.4167	2	0	1	1	0	0	0	0	0	5.68925
1539	0	19	1	0	1	1	0	0	0	0	0	4.73922
1540	0	34	2	0	2	2	0	0	0	0	0	2.66119
1541	1	53.75	3	1	3	1	0	0	0	0	0	6.12457
1542	1	40.6667	3	0	2	2	0	0	1	0	0	6.5243
1543	1	17	1	1	1	2	0	0	0	0	0	3.2553
1544	0	50.5	3	0	2	1	0	0	1	0	0	3.94524
1545	1	34.5833	2	1	3	2	0	0	0	0	0	6.51882
1546	0	43.3333	3	0	2	2	0	0	0	0	0	4.11499
1547	0	21.25	2	1	1	1	0	0	0	0	0	3.98357
1548	0	35.9167	2	0	1	1	0	0	0	0	0	6.94319
1549	0	16.4167	1	0	1	2	0	0	0	0	0	5.49487
1550	1	52.6667	3	0	1	1	1	0	1	0	0	4.00548
1551	0	26.25	2	0	2	1	0	0	0	0	0	6.39288
1552	1	31	2	0	3	1	0	0	0	0	0	6.22861
1553	0	37.1667	2	1	2	1	0	0	0	0	0	0.0438056
1554	1	39.8333	2	0	2	1	0	0	0	0	0	4.71184
1555	1	58	3	0	1	1	0	0	0	0	0	6.2423
1556	1	40.75	3	0	3	1	0	0	0	2	0	4.73648
1557	0	22.5	2	0	1	2	0	0	0	1	0	2.59822
1558	0	48.4167	3	1	2	2	0	0	0	0	0	4.37782
1559	0	46.5	3	1	3	1	1	0	0	2	0	3.52361
1560	0	61.5	3	1	1	1	0	0	1	0	0	2.28337
1561	0	54.0833	3	1	3	2	1	1	0	0	0	6.73511
1562	0	50.75	3	1	1	1	0	0	0	2	0	6.18207
1563	1	28	2	0	1	1	0	0	0	0	0	2.58453
1564	1	57.25	3	1	1	1	0	0	0	0	0	3.85216
1565	1	47.1667	3	1	3	1	0	0	0	0	1	0.158795
1566	0	36.9167	2	1	2	3	0	0	0	1	0	5.28953
1567	0	24.4167	2	1	2	1	0	0	0	0	0	4.19713
1568	0	49.0833	3	1	2	2	0	0	0	0	0	6.05613
1569	1	33.6667	2	0	1	2	0	0	0	0	0	3.47707
1570	0	26	2	0	2	1	0	0	0	0	0	5.76591
1571	1	43.6667	3	1	1	1	0	0	1	1	0	5.74675
1572	1	30	2	1	2	1	0	0	0	0	0	3.79466
1573	1	36.75	2	0	2	1	0	0	0	0	0	3.9206
1574	1	57.75	3	0	3	1	0	0	0	1	0	6.19849
1575	1	58.75	3	0	1	1	0	0	0	0	0	4.57769
1576	1	41.8333	3	0	1	1	0	0	1	0	0	5.44285
1577	1	13.0833	1	0	1	2	0	0	0	0	0	6.39836
1578	0	38.8333	2	0	2	1	0	0	0	1	0	5.35797
1579	0	34.5	2	0	1	2	0	0	0	1	1	3.43326
1580	0	57.75	3	1	1	2	0	0	0	0	0	4.89528
1581	0	24.4167	2	0	1	2	0	0	0	1	0	5.76591
1582	0	47.5	3	0	2	2	0	0	1	0	0	5.5332
1583	0	52.75	3	0	1	2	0	0	1	0	0	6.24778
1584	1	58.8333	3	1	1	2	0	0	1	0	0	4.63244
1585	0	27.1667	2	0	1	2	0	0	0	0	0	6.33812
1586	1	54.5833	3	0	3	1	0	0	0	0	0	3.60027
1587	1	66.3333	4	0	1	2	1	1	0	0	0	3.17864
1588	1	62.4167	3	0	1	1	1	1	0	0	0	2.75154
1589	1	41	3	1	2	1	1	1	0	1	0	1.34155
1590	1	33.0833	2	1	1	1	0	0	1	1	0	6.50787
1591	1	75.5833	4	1	1	1	1	0	1	2	0	5.68378
1592	0	55	3	1	3	1	1	0	0	0	0	2.14921
1593	0	58.5833	3	0	2	1	1	0	0	1	0	2.59001
1594	1	57.4167	3	0	3	1	0	0	0	0	0	6.58179
1595	1	59.1667	3	1	2	1	0	0	1	0	0	3.84668
1596	0	17.8333	1	1	1	2	0	0	0	0	0	5.00205
1597	0	57.25	3	1	3	1	0	0	1	0	0	2.66393
1598	0	62.4167	3	1	3	1	0	0	0	0	0	1.39904
1599	0	29.5	2	0	2	2	0	0	0	0	0	6.81725
1600	1	59.1667	3	1	3	1	1	1	1	1	0	5.66735
1601	1	20.4167	2	0	1	1	0	0	1	1	0	4.82136
1602	1	13.5833	1	0	1	1	0	0	0	0	0	5.24846
1603	0	37.6667	2	1	2	3	0	0	0	1	0	6.39836
1604	0	40.75	3	0	1	1	0	0	0	1	0	5.13073
1605	0	27.75	2	0	2	1	0	0	0	0	0	1.81793
1606	0	37.4167	2	0	1	2	0	0	0	1	0	5.03217
1607	1	54.3333	3	1	3	1	0	0	0	0	0	5.41821
1608	0	54.25	3	0	3	1	0	0	0	0	0	6.51335
1609	0	34.75	2	0	2	2	0	0	0	0	0	4.42984
1610	1	73.3333	4	0	1	1	1	0	1	2	0	2.32717
1611	1	46.25	3	0	2	1	1	0	0	0	1	1.60712
1612	1	45.1667	3	1	3	2	1	0	0	0	0	6.68583
1613	0	13.9167	1	0	1	1	0	0	0	0	0	6.66119
1614	1	35.9167	2	0	2	2	0	0	1	0	0	4.15332
1615	1	55.8333	3	1	3	1	0	0	0	2	0	1.83162
1616	1	35.75	2	0	1	1	0	0	0	1	0	5.18275
1617	1	26.5833	2	0	3	1	0	0	0	0	0	5.02943
1618	1	27.1667	2	0	2	1	0	0	0	0	0	5.33881
1619	1	31.3333	2	0	1	1	0	0	0	0	0	5.99316
1620	1	59.75	3	0	3	1	0	0	0	0	0	3.08282
1621	0	20.8333	2	1	2	1	0	0	0	0	0	4.86516
1622	1	76.1667	4	1	2	2	1	0	0	1	0	4.62697
1623	1	24.0833	2	0	1	2	0	0	0	0	0	3.77002
1624	1	48.4167	3	1	3	1	0	0	0	0	0	3.89049
1625	1	36.9167	2	1	3	1	0	0	0	1	0	4.98289
1626	0	46.5833	3	0	2	1	0	0	1	0	0	5.38261
1627	1	53.5833	3	1	1	1	0	0	0	0	0	3.83299
1628	0	70.1667	4	0	1	2	1	0	1	2	1	0.714579
1629	0	54.5	3	1	3	2	0	0	0	0	0	4.55031
1630	0	43.5833	3	0	1	3	0	0	0	2	0	4.23546
1631	1	28.4167	2	1	1	1	0	0	0	0	0	6.61191
1632	0	31	2	0	3	2	0	0	0	0	0	1.33881
1633	0	27.5	2	1	1	2	0	0	0	1	0	5.75222
1634	0	49.5833	3	1	3	2	0	0	0	1	1	3.86858
1635	0	54.8333	3	1	2	1	0	0	0	1	0	5.27036
1636	0	75.5833	4	1	2	1	1	0	0	0	0	6.85558
1637	0	59.75	3	1	1	1	1	0	0	1	0	4.23819
1638	0	33	2	0	1	1	0	0	0	0	0	5.86721
1639	1	61.0833	3	1	2	1	0	0	0	1	0	6.83641
1640	1	52.5833	3	1	1	1	0	0	0	0	0	6.85284
1641	1	45.6667	3	1	2	1	0	0	0	1	0	4.34497
1642	0	61.25	3	1	1	1	1	1	0	0	0	1.73306
1643	1	16	1	1	1	3	0	0	0	0	0	5.51129
1644	1	44.9167	3	1	2	1	0	0	0	0	0	3.59754
1645	0	20.1667	2	1	1	1	0	0	0	0	0	4.13689
1646	1	27.6667	2	1	1	2	0	0	0	0	0	5.48118
1647	0	55.4167	3	0	3	2	0	0	0	0	0	4.11499
1648	1	34.25	2	1	1	2	0	0	0	0	0	3.23066
1649	1	43	3	0	2	3	1	0	1	1	0	3.77276
1650	1	53.1667	3	1	2	1	0	0	0	0	0	4.86516
1651	1	30.9167	2	1	3	1	1	0	0	1	0	6.14374
1652	1	37.75	2	0	2	1	0	0	0	0	0	2.27242
1653	1	52.3333	3	1	3	1	1	0	0	1	0	3.54825
1654	1	21.5833	2	1	3	1	0	0	0	0	0	6.37645
1655	1	63.5	3	1	1	2	0	0	0	0	0	5.36345
1656	1	49.8333	3	1	2	1	1	0	0	1	0	5.38809
1657	1	30.5833	2	0	1	1	0	0	1	1	0	4.61328
1658	1	64.75	3	1	3	1	1	1	1	2	0	4.31211
1659	0	27.25	2	0	2	1	0	0	0	0	0	3.54004
1660	0	57.3333	3	1	1	1	0	0	0	0	0	5.38809
1661	1	72.9167	4	0	1	1	1	0	1	1	0	4.25736
1662	1	71.5	4	0	1	2	1	0	1	0	0	5.15264
1663	1	46.9167	3	1	3	1	0	0	0	0	0	4.11499
1664	0	47	3	0	1	1	0	0	0	0	0	2.83368
1665	1	15.5833	1	0	1	1	0	0	0	0	0	6.69131
1666	0	13.25	1	1	1	2	0	0	0	0	0	4.81314
1667	1	43.25	3	0	1	1	0	0	0	0	0	6.65298
1668	1	38.1667	2	0	1	1	0	0	0	0	0	6.35729
1669	1	66.5	4	0	1	1	0	0	0	0	0	4.47639
1670	0	43.8333	3	1	3	1	0	0	1	0	0	3.12115
1671	1	31.6667	2	0	1	2	0	0	0	0	0	3.37029
1672	1	43.5833	3	0	1	2	0	0	1	0	0	6.4011
1673	1	55.3333	3	1	2	2	0	0	0	0	0	5.88364
1674	1	59.0833	3	1	3	1	1	0	0	0	0	5.84805
1675	1	64.1667	3	0	1	1	0	0	1	0	0	3.35113
1676	1	56.75	3	1	2	2	0	0	0	0	0	5.48939
1677	1	30.0833	2	1	2	2	0	0	0	0	0	5.68378
1678	1	66.75	4	0	2	1	1	0	1	2	0	5.36345
1679	0	40.3333	3	1	3	2	0	0	0	0	0	4.70363
1680	0	28	2	0	1	1	0	0	0	1	0	2.04791
1681	0	13.0833	1	0	1	1	0	0	0	0	0	4.22724
1682	0	43.5833	3	0	1	1	0	0	1	1	0	5.86448
1683	1	17.1667	1	1	1	1	0	0	0	0	0	3.5729
1684	0	38.0833	2	1	3	1	0	0	0	0	0	4.40246
1685	1	59.5	3	1	3	1	0	1	1	1	0	5.50856
1686	0	55.75	3	0	2	2	0	1	1	1	0	2.4449
1687	1	13.75	1	0	1	3	0	0	0	0	0	5.4976
1688	1	47.25	3	0	1	1	0	0	0	2	0	2.71869
1689	1	56.1667	3	0	2	2	1	0	1	0	0	6.8063
1690	1	25.8333	2	0	1	1	0	0	0	1	0	6.44216
1691	0	23.0833	2	1	2	2	0	0	0	1	0	3.86311
1692	0	56.1667	3	1	1	1	1	1	1	0	0	6.3655
1693	0	29.3333	2	1	1	1	0	0	0	0	0	6.95688
1694	1	69.75	4	0	1	1	0	0	0	0	0	6.60917
1695	0	38.3333	2	0	3	1	0	0	1	0	0	5.44011
1696	1	23.3333	2	1	1	1	0	0	0	0	0	6.33265
1697	0	30.4167	2	1	3	1	0	0	1	0	0	6.42847
1698	0	57.8333	3	0	2	2	0	0	0	0	0	5.11704
1699	1	71.8333	4	0	2	3	1	0	0	2	0	5.13621
1700	1	13.3333	1	0	1	1	0	0	0	0	0	2.99247
1701	0	27.6667	2	0	2	1	0	0	0	0	0	2.69131
1702	0	13.3333	1	1	1	1	0	0	0	0	0	6.11636
1703	1	85.3333	4	1	1	1	1	0	0	1	0	5.28679
1704	0	18.3333	1	0	1	1	0	0	0	1	0	6.09172
1705	0	30.5	2	0	1	1	0	0	1	0	0	6.49144
1706	0	50.5833	3	0	2	1	0	0	0	0	0	5.47844
1707	0	29.25	2	0	3	1	0	0	0	0	0	4.90349
1708	0	50.5833	3	0	1	1	0	0	0	0	0	2.09719
1709	1	72.5	4	1	1	1	1	0	0	1	0	5.10883
1710	1	47.5833	3	1	3	1	1	0	0	0	0	2.61739
1711	0	26.0833	2	0	2	1	0	0	0	0	0	2.79535
1712	0	51.1667	3	1	3	1	0	0	0	2	0	2.06434
1713	1	29.9167	2	1	1	1	0	0	0	0	0	3.2553
1714	0	45.9167	3	1	3	3	0	0	0	0	0	6.63929
1715	0	56.0833	3	1	2	1	0	0	1	0	0	6.16838
1716	0	38.5833	2	1	3	2	0	0	1	0	0	6.41205
1717	0	44.5	3	0	1	2	0	0	0	0	1	3.69062
1718	0	31.5	2	0	1	3	0	0	1	0	0	3.02259
1719	0	57.6667	3	0	1	1	1	0	0	1	0	4.94456
1720	1	17.8333	1	0	1	2	0	0	0	0	0	4.34771
1721	1	58.4167	3	1	1	1	0	1	0	1	0	5.74401
1722	0	33.3333	2	0	2	1	0	0	0	0	0	2.62012
1723	1	27.75	2	0	1	1	0	1	1	1	0	4.81314
1724	1	39.75	2	0	2	2	0	0	0	0	0	3.89322
1725	1	20.3333	2	1	1	1	0	0	0	0	0	5.72485
1726	0	41.6667	3	0	1	1	0	0	0	0	0	6.87201
1727	1	22.0833	2	0	2	1	0	0	0	0	0	6.68036
1728	0	23.0833	2	0	1	2	0	0	0	0	0	5.77139
1729	1	38.1667	2	0	1	1	0	0	0	0	0	6.8501
1730	1	34.5833	2	0	3	1	0	0	0	0	0	5.04038
1731	0	17.6667	1	1	1	2	0	0	0	0	0	3.77276
1732	0	51.9167	3	0	2	1	0	0	0	0	0	6.14648
1733	0	52.3333	3	1	3	1	0	0	0	0	0	4.53936
1734	0	20.25	2	0	1	1	0	0	0	0	0	4.57221
1735	1	34.1667	2	1	2	1	0	0	0	0	0	4.12047
1736	0	32	2	1	2	1	0	0	0	2	0	3.05818
1737	1	13.1667	1	1	1	1	0	0	0	0	0	4.48186
1738	1	38.5833	2	0	1	1	0	0	0	1	0	5.73306
1739	0	13.1667	1	0	1	2	0	0	0	0	0	4.94182
1740	0	33.8333	2	0	3	1	0	0	0	1	0	6.3436
1741	1	43.0833	3	0	1	1	0	0	0	0	0	2.1629
1742	1	39.5	2	1	3	1	0	0	0	1	0	1.99589
1743	0	54.5	3	1	3	1	1	1	0	0	0	4.11225
1744	1	43.6667	3	1	3	1	0	0	0	0	0	4.47639
1745	1	33.6667	2	1	2	1	0	0	0	0	0	1.90554
1746	1	22	2	1	1	1	0	0	0	0	0	6.76797
1747	1	38.9167	2	1	2	2	0	0	0	0	0	4.67625
1748	0	75.9167	4	1	1	2	1	0	0	1	0	4.7447
1749	1	63.5833	3	0	2	1	1	0	0	1	0	6.00684
1750	0	15.9167	1	0	1	1	0	0	0	0	0	5.40726
1751	1	14.5	1	0	1	1	0	0	0	0	0	5.62355
1752	0	50	3	1	3	1	0	0	0	0	0	1.99042
1753	1	27.8333	2	1	1	1	0	0	0	0	0	3.21971
1754	1	47.3333	3	1	3	1	1	0	0	0	0	6.81177
1755	1	43.4167	3	0	2	1	0	0	0	0	0	5.62355
1756	1	53.0833	3	0	2	1	0	0	0	0	0	2.75154
1757	1	49.75	3	0	2	1	0	0	0	0	1	3.24435
1758	0	29.0833	2	0	2	2	0	0	1	0	0	1.79329
1759	0	31.8333	2	0	2	1	0	0	0	0	0	4.32854
1760	0	66.4167	4	0	1	2	0	0	1	0	0	6.47502
1761	1	44.1667	3	1	1	1	0	1	0	1	0	6.68036
1762	1	36.6667	2	1	2	1	0	0	0	0	0	5.3963
1763	1	43.8333	3	0	1	1	1	1	1	1	0	1.16359
1764	1	51.0833	3	1	2	1	0	1	0	1	0	5.72758
1765	0	15.5833	1	0	1	3	0	0	0	0	0	4.89802
1766	1	39.0833	2	1	3	1	0	0	0	1	0	5.94114
1767	0	66.5	4	0	1	1	0	0	0	0	0	4.46817
1768	1	56.6667	3	1	3	1	0	0	1	1	0	6.93771
1769	0	53.4167	3	1	3	1	0	1	0	1	0	5.17728
1770	1	31.9167	2	0	3	1	0	0	1	0	0	4.26283
1771	0	54.75	3	0	1	1	0	0	0	0	0	2.52156
1772	1	27.1667	2	0	1	1	0	0	0	0	0	6.81725
1773	1	15.3333	1	0	1	1	0	0	0	0	0	3.38125
1774	0	41.6667	3	1	3	1	0	0	0	0	0	5.20465
1775	1	33.0833	2	1	3	1	0	0	0	0	0	4.98563
1776	0	45.0833	3	1	3	3	0	0	0	0	0	2.33265
1777	0	58.5	3	1	2	3	0	0	1	1	0	6.88843
1778	1	64.75	3	0	1	3	1	0	0	1	0	3.38398
1779	1	51.75	3	1	1	1	0	0	0	0	0	5.08966
1780	1	82.5	4	1	1	2	1	0	0	2	0	6.81999
1781	1	68.3333	4	0	1	1	1	1	0	1	0	2.16838
1782	1	64.3333	3	0	2	1	0	0	1	2	0	3.90965
1783	0	19.0833	1	0	1	1	0	0	0	0	0	6.13279
1784	1	50.1667	3	1	2	1	1	0	0	0	0	1.8809
1785	0	55.6667	3	0	3	1	0	0	0	1	0	1.68104
1786	1	34.5833	2	0	3	1	0	0	0	0	0	6.72964
1787	1	36.25	2	0	2	1	0	0	0	0	0	4.27105
1788	0	72.0833	4	1	2	2	0	0	1	0	0	1.87817
1789	1	22.9167	2	0	1	1	0	0	0	0	0	3.98084
1790	1	40.6667	3	1	3	1	0	0	0	0	0	5.50308
1791	0	77.6667	4	1	2	1	0	1	1	1	0	6.05613
1792	1	42.3333	3	0	2	1	0	0	0	0	0	6.51882
1793	1	43.1667	3	0	3	1	0	1	1	0	0	5.86721
1794	1	31.25	2	1	3	2	0	0	0	0	0	2.38741
1795	1	47.0833	3	0	3	3	0	0	0	0	0	6.65298
1796	1	58.25	3	1	2	3	0	0	0	0	0	4.27105
1797	0	32.25	2	1	1	1	0	0	0	0	0	5.09788
1798	0	28.25	2	0	3	2	0	0	0	0	0	2.89665
1799	1	53	3	0	2	2	0	0	0	0	0	4.03833
1800	0	58.5833	3	1	3	1	0	1	0	1	0	2.31075
1801	1	51.5833	3	1	3	1	0	0	0	0	0	5.73306
1802	0	38.75	2	0	2	1	0	1	1	0	0	5.42368
1803	1	56	3	0	1	1	0	0	0	2	0	4.30938
1804	0	48.4167	3	1	1	2	0	0	0	0	0	3.89049
1805	0	49.3333	3	0	2	2	0	0	0	0	0	3.29911
1806	1	13.3333	1	1	1	1	0	0	0	0	0	6.67762
1807	1	57	3	1	1	1	1	0	0	0	0	5.21561
1808	0	21.3333	2	0	1	1	0	0	0	0	0	5.51951
1809	0	48.75	3	0	1	1	0	0	0	0	0	4.38877
1810	0	22.9167	2	0	1	1	0	0	0	0	0	4.96099
1811	1	70.5833	4	0	1	1	1	1	1	1	0	3.23888
1812	0	42.6667	3	0	2	1	0	0	0	0	0	5.69473
1813	0	24.75	2	0	2	1	0	0	0	0	0	4.45996
1814	0	35.6667	2	1	3	1	0	0	0	1	0	3.15127
1815	0	52.5	3	0	2	2	0	0	1	1	0	6.2204
1816	0	57.5833	3	0	3	1	0	0	0	0	0	4.02464
1817	1	51.25	3	1	3	2	0	0	0	0	0	6.61465
1818	1	17.5833	1	0	1	1	0	0	0	0	0	6.00137
1819	1	31.4167	2	1	2	1	0	0	0	0	0	2.12731
1820	1	27.5	2	0	3	2	0	0	0	0	0	6.36277
1821	0	54.25	3	0	1	1	0	0	0	0	0	4.41068
1822	0	36.5833	2	1	1	2	0	0	0	0	0	1.42642
1823	1	14.0833	1	1	1	3	0	0	0	0	0	2.41752
1824	0	53.0833	3	0	1	2	1	0	0	0	0	2.10267
1825	0	59.4167	3	1	3	2	0	0	0	0	0	3.40589
1826	0	14	1	1	1	1	0	0	0	0	0	4.89802
1827	1	51.8333	3	0	2	1	0	0	0	0	0	5.27036
1828	0	69.1667	4	0	1	1	1	1	0	0	0	6.79808
1829	1	53.8333	3	1	3	1	0	0	0	0	0	6.6256
1830	1	28.3333	2	1	3	1	0	0	0	0	0	5.80972
1831	1	27.6667	2	1	2	1	0	0	0	0	0	5.53593
1832	1	61.8333	3	0	1	1	0	0	0	0	0	6.29979
1833	0	30.3333	2	1	2	2	0	0	0	0	0	6.29432
1834	1	19.0833	1	0	1	1	0	0	0	0	0	5.27036
1835	0	43.5	3	0	2	1	0	0	0	1	0	2.69405
1836	1	33.3333	2	0	3	1	0	0	0	0	0	3.28816
1837	0	21.0833	2	0	2	2	0	0	0	0	0	4.40794
1838	1	25.75	2	1	2	1	0	0	0	0	0	1.64271
1839	0	50.5	3	0	3	1	0	0	0	0	0	2.91307
1840	0	43.5	3	0	1	1	0	0	0	0	0	5.76044
1841	1	56	3	1	2	1	0	0	0	2	0	2.64203
1842	1	43.8333	3	1	3	1	0	0	0	0	0	6.77892
1843	1	68.25	4	1	1	3	0	0	1	0	0	5.65366
1844	1	52.5833	3	1	1	1	1	0	0	1	0	5.48939
1845	0	61.75	3	1	1	1	1	1	1	0	0	5.74127
1846	0	38.25	2	0	3	1	0	0	0	0	0	5.47023
1847	1	25.25	2	1	2	1	0	0	0	0	0	4.64066
1848	1	14.1667	1	0	1	1	0	0	0	0	0	5.86721
1849	1	38	2	0	2	1	0	0	0	0	0	4.26831
1850	0	34.4167	2	1	2	1	0	0	0	0	0	5.3963
1851	0	46.3333	3	0	1	1	0	0	1	0	0	1.85626
1852	0	36	2	0	2	2	0	0	0	0	0	6.04791
1853	1	28.5833	2	1	3	1	0	0	1	1	0	5.53046
1854	0	57.5833	3	0	3	2	0	0	0	1	0	4.64887
1855	1	75.25	4	1	1	1	1	0	1	1	0	6.11362
1856	1	43.0833	3	0	2	2	0	0	0	0	0	3.0089
1857	1	23.75	2	0	1	2	0	0	0	1	0	4.03833
1858	0	50.9167	3	0	1	2	0	0	1	0	0	6.55168
1859	0	17	1	1	1	1	0	0	0	0	0	3.2553
1860	0	54.3333	3	0	2	2	0	1	1	0	0	1.24298
1861	1	50.1667	3	1	3	2	0	0	0	0	0	4.98289
1862	1	38.3333	2	0	1	1	0	0	0	0	0	5.69747
1863	0	24.5	2	0	1	1	0	0	0	1	0	6.57358
1864	1	13.6667	1	1	1	1	0	0	0	0	0	4.84326
1865	0	14.8333	1	0	1	1	0	0	0	0	0	3.50445
1866	1	35.3333	2	0	2	1	0	0	0	0	0	6.97878
1867	0	58.8333	3	1	3	1	0	1	1	1	0	5.02122
1868	0	48.4167	3	1	3	1	0	0	0	0	0	1.72758
1869	0	60.0833	3	0	2	1	0	0	1	0	0	3.96167
1870	0	54.6667	3	0	1	1	0	0	0	1	0	3.93155
1871	1	40.4167	3	1	2	3	0	0	0	0	0	4.90349
1872	0	52.5833	3	1	2	2	0	0	1	1	0	5.54141
1873	1	71.75	4	0	1	1	1	0	0	0	0	6.17112
1874	1	45.8333	3	0	2	1	0	0	0	0	0	5.12526
1875	0	30.4167	2	1	3	1	0	0	0	1	0	6.78713
1876	0	39.1667	2	1	3	1	0	0	1	0	0	6.5243
1877	1	29.9167	2	1	1	2	0	0	0	0	0	4.8104
1878	1	44.4167	3	1	1	1	0	0	0	0	0	5.37988
1879	1	23.75	2	1	1	1	0	0	0	0	0	2.99247
1880	0	26.8333	2	0	2	2	0	0	0	0	0	3.8412
1881	1	29.0833	2	0	1	2	0	0	0	1	0	5.33881
1882	1	51.5833	3	1	3	1	0	0	1	0	0	5.85352
1883	0	54.9167	3	0	3	1	1	1	1	1	0	6.02601
1884	1	63.5	3	0	2	3	1	0	0	0	0	5.63176
1885	1	26	2	1	3	2	0	0	0	0	0	4.67351
1886	1	51.6667	3	1	3	1	0	0	0	0	0	2.92129
1887	0	30.25	2	0	1	3	0	0	0	1	0	2.25599
1888	1	26.6667	2	1	2	1	0	0	0	0	0	6.63381
1889	1	62.9167	3	1	3	3	1	1	0	1	0	3.92608
1890	1	54.25	3	1	1	1	0	0	0	0	0	6.19028
1891	0	56.25	3	1	2	1	1	0	1	1	0	6.97057
1892	0	61.6667	3	1	1	1	0	0	1	1	0	3.26626
1893	1	13	1	0	1	2	0	0	0	0	0	5.42094
1894	1	21.9167	2	0	2	1	0	0	0	0	0	5.93292
1895	1	37.25	2	0	1	2	0	0	1	0	0	6.4011
1896	1	26.1667	2	0	2	1	0	0	1	0	0	6.87201
1897	1	62.75	3	0	1	1	0	1	0	0	0	3.42505
1898	0	52.6667	3	0	2	2	1	1	0	0	0	6.59548
1899	0	35	2	0	3	1	0	0	1	0	0	4.42437
1900	1	29.5833	2	0	3	1	0	0	1	0	0	6.38193
1901	0	60.1667	3	1	1	1	1	1	0	1	0	5.23203
1902	1	40.6667	3	0	2	1	0	0	1	0	1	0.577687
1903	1	61	3	1	3	1	0	0	0	0	0	6.89391
1904	1	32.25	2	1	3	1	0	0	0	1	0	6.04517
1905	0	59.1667	3	0	1	2	0	0	0	1	0	6.28337
1906	1	47.8333	3	1	2	2	0	0	0	0	0	4.13142
1907	1	10.5	1	0	1	2	0	0	0	0	0	6.43943
1908	1	34.5	2	0	2	1	0	0	1	0	0	6.89938
1909	0	39.5833	2	0	2	2	0	0	0	0	0	2.31075
1910	1	48.9167	3	1	1	3	1	0	1	2	0	5.93566
1911	1	55.0833	3	1	1	2	0	0	1	0	0	5.28405
1912	0	57.6667	3	1	1	1	0	0	0	0	0	4.9473
1913	1	82.0833	4	0	1	1	1	0	1	0	0	3.73717
1914	0	28.1667	2	0	1	1	0	0	1	0	0	5.95209
1915	1	52.4167	3	0	1	1	1	1	1	0	0	6.91581
1916	1	13.0833	1	1	1	2	0	0	0	0	0	3.34565
1917	1	51.5	3	0	1	1	0	0	0	0	0	4.54483
1918	1	30.9167	2	1	1	2	0	0	0	0	0	6.23135
1919	1	41.9167	3	1	2	1	0	0	1	0	0	3.46612
1920	1	23.0833	2	1	1	1	0	0	0	0	1	3.24709
1921	1	43.9167	3	1	1	1	0	0	0	0	0	2.37919
1922	1	44.0833	3	1	3	2	0	0	0	0	0	2.87201
1923	1	34.3333	2	1	1	2	0	0	0	0	0	4.9473
1924	1	60.3333	3	0	3	1	1	1	1	0	0	3.73443
1925	1	43.25	3	1	1	1	1	0	0	1	0	4.16153
1926	1	49.9167	3	0	3	1	0	0	0	0	1	1.08693
1927	1	54.6667	3	1	3	2	0	0	0	0	0	1.2293
1928	0	25.9167	2	1	1	1	0	0	0	0	0	5.55236
1929	0	43.5	3	0	2	2	1	0	0	1	0	5.66461
1930	0	47.9167	3	0	2	1	1	1	0	1	0	3.60301
1931	0	28.3333	2	0	1	2	0	0	0	0	0	6.92129
1932	0	20.3333	2	0	2	2	0	0	0	0	0	6.12183
1933	1	51.8333	3	0	3	1	0	0	0	0	0	3.14031
1934	0	16.0833	1	0	1	2	0	0	0	0	0	5.68378
1935	1	67	4	0	1	2	1	0	1	1	0	6.03422
1936	0	5.58333	1	0	1	1	0	0	0	0	0	4.94456
1937	0	23.5833	2	1	1	1	0	0	0	1	0	4.44901
1938	0	40.25	3	0	1	1	0	0	0	0	0	6.87748
1939	1	46.5833	3	1	3	1	0	0	0	0	0	4.74743
1940	1	56.75	3	1	1	2	1	1	0	1	0	4.84873
1941	1	28.4167	2	0	1	1	0	0	0	0	0	3.15948
1942	0	48.8333	3	1	3	2	1	1	1	1	0	5.99863
1943	1	45.9167	3	1	2	1	0	0	0	0	0	6.51608
1944	1	16.4167	1	0	1	1	0	0	0	0	0	6.5681
1945	0	51.9167	3	1	2	2	0	0	0	0	0	3.52361
1946	1	34	2	0	3	1	0	0	0	0	0	6.64203
1947	0	73	4	1	1	1	0	0	0	0	0	6.00958
1948	0	66.25	4	1	1	1	0	0	1	1	0	2.74333
1949	0	28.6667	2	0	2	1	0	0	0	0	0	6.59001
1950	0	39.8333	2	0	2	1	0	0	0	0	0	5.35797
1951	0	67.9167	4	1	1	1	1	1	0	1	0	4.59685
1952	0	20.6667	2	0	1	1	0	0	0	0	0	6.93498
1953	0	78.75	4	1	1	1	1	1	0	1	0	5.859
1954	0	59.4167	3	0	1	1	0	0	0	2	0	6.72416
1955	1	25.1667	2	0	1	1	0	0	0	0	0	5.13347
1956	0	50.4167	3	1	1	1	0	0	0	0	0	6.70773
1957	1	24	2	0	1	2	0	0	0	0	0	5.40726
1958	0	44.8333	3	0	3	1	0	0	0	0	0	4.41889
1959	0	47.9167	3	0	2	1	0	0	0	0	0	4.16975
1960	1	43.75	3	0	2	3	0	0	0	1	0	5.33607
1961	0	60.5833	3	1	2	2	0	0	0	0	0	6.17385
1962	0	66.8333	4	0	1	1	1	0	0	0	0	6.09446
1963	1	40.25	3	0	3	3	0	0	0	0	0	5.74675
1964	0	48.6667	3	0	2	2	0	0	0	0	0	5.84805
1965	1	34.3333	2	0	2	1	0	0	1	0	0	5.05955
1966	1	54.5	3	1	2	2	0	0	1	0	0	6.69131
1967	1	55.75	3	0	1	1	0	0	0	1	0	6.3217
1968	0	62	3	1	3	1	0	0	0	0	0	5.3306
1969	0	45.6667	3	0	2	2	0	0	0	0	0	3.56742
1970	1	67.3333	4	1	2	3	0	1	1	0	0	5.5551
1971	1	41.3333	3	0	1	3	1	1	1	2	0	3.98084
1972	0	33	2	1	3	1	0	0	0	0	0	2.84463
1973	1	48.8333	3	0	3	1	0	0	0	0	0	4.52293
1974	1	63.8333	3	0	1	1	0	0	0	0	0	3.02259
1975	0	30.8333	2	0	2	1	0	0	0	0	0	3.34565
1976	1	21	2	0	1	1	0	0	0	0	0	4.96099
1977	1	63.0833	3	1	3	1	1	1	1	0	0	5.81793
1978	0	13.4167	1	0	1	2	0	0	0	0	0	5.82341
1979	0	52.1667	3	0	2	1	0	0	0	0	0	6.10815
1980	0	44.5833	3	0	2	1	0	0	0	0	0	5.03217
1981	1	25.25	2	1	1	1	0	0	0	1	0	3.17864
1982	0	36.3333	2	0	1	1	0	0	0	0	0	6.141
1983	0	72.4167	4	0	1	2	1	1	1	0	1	4.01369
1984	1	53.3333	3	0	3	1	0	0	0	0	0	2.71595
1985	0	25.5833	2	0	1	2	0	0	0	0	0	4.85969
1986	0	24.6667	2	0	2	2	0	0	0	0	0	4.87885
1987	1	24.0833	2	0	2	1	0	0	0	0	0	6.40383
1988	1	52	3	1	1	1	0	0	0	0	0	6.57632
1989	1	24.3333	2	1	2	1	0	0	0	0	0	4.18891
1990	1	25.5	2	0	2	1	0	0	0	0	0	6.01506
1991	0	30.75	2	1	3	2	0	0	0	0	0	5.31691
1992	1	66.25	4	1	2	2	1	1	0	1	0	1.21834
1993	0	56.0833	3	1	1	1	1	1	0	2	0	0.128679
1994	0	55.6667	3	0	1	1	0	0	1	0	1	3.57837
1995	0	13.4167	1	1	1	2	0	0	0	0	0	5.97399
1996	1	60.3333	3	1	2	2	0	0	1	0	0	4.00821
1997	1	67.6667	4	1	3	1	0	1	0	2	0	2.71321
1998	1	34.9167	2	1	3	1	0	0	0	0	0	6.90486
1999	1	13.5	1	1	1	2	0	0	0	0	0	6.4668
[truncated: 151,531 more rows]
